# Supplementary material for: Revealing the kinetic limits of sodiation and lithiation at hard carbon using the diluted electrode method
Source: Royal Society of Chemistry journal article supplement (doi:10.1039/d5sc07762a), 2025-12-15
Supplement: d5sc07762a1.pdf [file d5sc07762a1.pdf]

Supporting Information

Revealing the Kinetic Limits of Sodiation and Lithiation at Hard Carbon Using the Diluted Electrode Method

Yuki Fujii,<sup>a</sup> Zachary T. Gossage,<sup>a</sup> Ryoichi Tatara,<sup>a</sup> and Shinichi Komaba<sup>a,\*</sup>

<sup>a</sup> *Department of Applied Chemistry, Tokyo University of Science, Shinjuku, Tokyo 162-8601, Japan*

Corresponding Author

\* To whom all correspondence should be addressed

E-mail: [komaba@rs.tus.ac.jp](mailto:komaba@rs.tus.ac.jp)

Yuki Fujii: <https://orcid.org/0009-0002-8394-8560>

Zachary T. Gossage: <https://orcid.org/0000-0003-3745-2919>

Ryoichi Tatara: <https://orcid.org/0000-0002-8148-5294>

Shinichi Komaba: <https://orcid.org/0000-0002-9757-5905>

**Supplemental Figures and Tables**

|                                                                                                  |        |
|--------------------------------------------------------------------------------------------------|--------|
| Figure S1. Material characterization: XRD.....                                                   | S3     |
| Figure S2. Material characterization: SAXS, Elemental analysis, Particle size distribution.....  | S4     |
| Table S1. Mass composition of diluted HC-electrodes.....                                         | S5     |
| Table S3. SEM-EDX images of composite electrodes.....                                            | S6     |
| Figure S4. Electronic conductivity of composite electrodes.....                                  | S7     |
| Figure S5. Capacity correction for rate-capability.....                                          | S8     |
| Table S2. Capacities of diluted HC-electrodes obtained in Na- and Li-cells.....                  | S9–S10 |
| Figure S6. Rate-capabilities and $D_{app}$ for sodiation and lithiation of HC electrodes.....    | S11    |
| Figure S7. Charge-discharge curves during rate-performance testing of 5 vol.% HC-electrode.....  | S12    |
| Figure S8. Tafel plots of Na- and Li-cells consisting of 5 vol.% HC-electrode.....               | S13    |
| Figure S9. Lithium intercalation into diluted graphite-electrode.....                            | S14    |
| Figure S10. Rate-capabilities for sodiation and lithiation in ether-based electrolyte.....       | S15    |
| Figure S11. Potential-step chronoamperometry for Na-/Li-insertion into diluted HC-electrode..... | S16    |
| Figure S12. Slope- and plateau-capacities obtained by galvanostatic charging.....                | S17    |
| Table S3. Characteristic times for sodiation and lithiation of HC.....                           | S18    |
| Figure S13. Chronoamperograms and $D_{app}$ during sodiation.....                                | S19    |
| Figure S14. Chronoamperograms and $D_{app}$ during lithiation.....                               | S20    |
| Figure S15. Electrochemical impedances of Na and Li metal .....                                  | S21    |
| Figure S16. Nyquist plots of thick 40 vol.% HC-electrode in 3-electrodes cell.....               | S22    |
| Figure S17. Bode plots of thick 40 vol.% HC-electrode in 3-electrodes cell.....                  | S23    |
| Figure S18. Electrochemical impedances of 5 vol.% HC-electrode in Na cell.....                   | S24    |
| Figure S19. Electrochemical impedances of 5 vol.% HC-electrode in Li cell.....                   | S25    |
| Figure S20. Equivalent circuits of 5 vol.% HC-electrode in Na- and Li-cell.....                  | S26    |
| Table S4. Charge-transfer resistances of 5 vol.% HC-electrode in Na- and Li-cell.....            | S27    |
| References in supporting information.....                                                        | S28    |

## Characteristics of hard carbon

Historically, the HC used in this study was developed for large-scale and high-power lithium-ion batteries, and the attractive property is the smaller surface-area and lower hygroscopic properties. This contributes to less irreversible capacity while maintaining rich alkali-metal storage site like normal commercial HCs.<sup>1,2</sup>

Characteristics of the hard carbon (HC) powder were investigated by X-ray diffraction, small angle X-ray scattering, elemental analysis, and laser scattering particle-size distribution analysis. The powder XRD pattern was collected using an X-ray diffractometer (SmartLab, Rigaku) in Bragg-Brentano geometry with Ni-filtered Cu K $\alpha$  radiation and a 1D silicon strip detector (D/teX Ultra 250, Rigaku). Small angle X-ray scattering (SAXS) data were collected with the X-ray diffractometer (SmartLab, Rigaku) in a transmission and parallel-beam geometry and a scintillation point detector (SC-70, Rigaku). Elemental composition of HC was evaluated by an organic elemental analyzer (vario EL cube, Elementar). Particle size distribution was evaluated by a laser scattering analyzer (LA-350, HORIBA).

According to the catalog of this HC,<sup>2</sup> values of BET surface area and true density of HC were 3–7 m<sup>2</sup> g<sup>-1</sup> and 1.52 g cm<sup>-3</sup>, respectively. Obtained values of  $d_{002}$  and  $L_a$  were almost consisted with catalog of this HC.<sup>2</sup> The graphitization degree estimated from 10 and 11 diffraction profiles were 0.09 and 0.15, respectively. However, further refinement is required to ensure the accuracy of graphitization degree. The micropore size, 1.05 nm, is consistent with that of sucrose-derived HC synthesized at 1300 °C,<sup>3</sup> and it may result in pseudo-metallic cluster with 2–4 atoms both of sodium and lithium storage. Existence of sulfur in low elemental compositions may be attributed to the petroleum pitch used as raw material.<sup>2</sup> Values of  $D_{50}$  and standard error of particle size distribution were 9.0  $\mu$ m and 3.5  $\mu$ m, respectively, and they were well consisted with previous reports.<sup>1,2</sup>

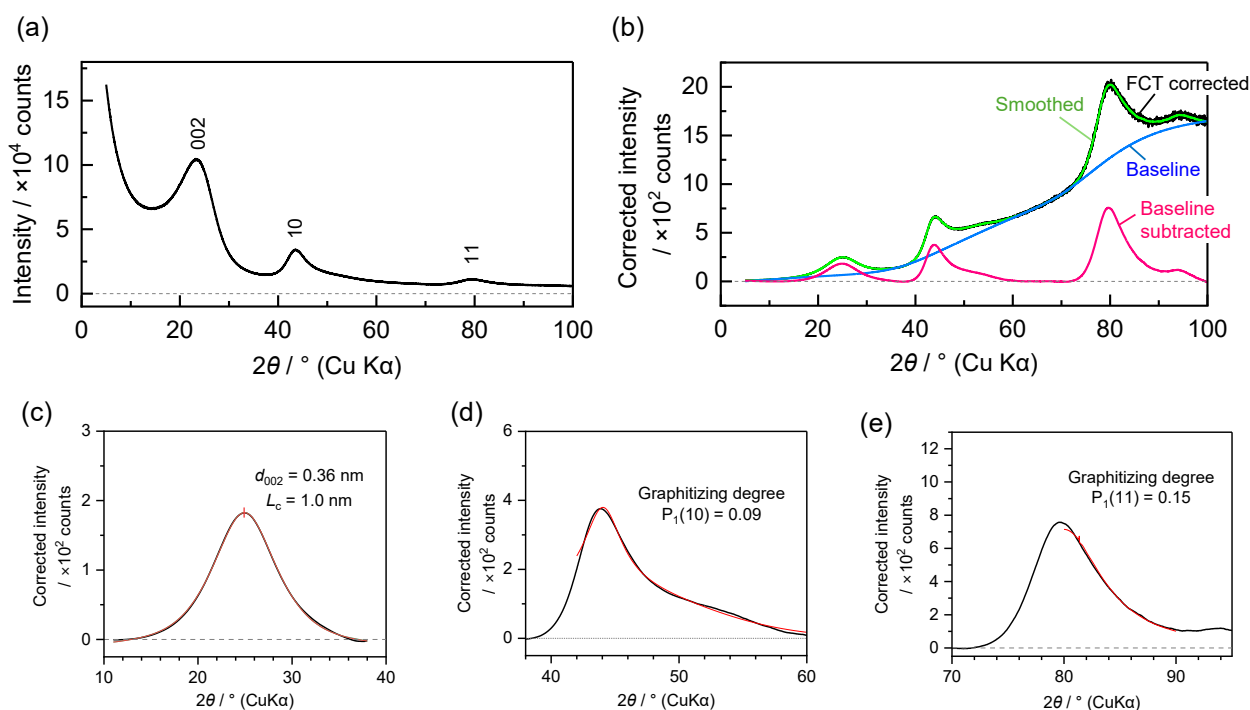

**Figure S1.** X-ray diffraction patterns (a) as measured, (b) corrected by FCT factors and baseline subtraction, (c) 002 diffraction peak fitted by using pseudo-Voigt function to estimate values of  $d_{002}$  and  $L_c$ . (d) 10 and (e) 11 diffraction peak fitted by using turbostratic stacking proposed by Fujimoto<sup>4</sup> to evaluate graphitizing degree. All fittings were performed with non-linear fitting in OriginPro software.

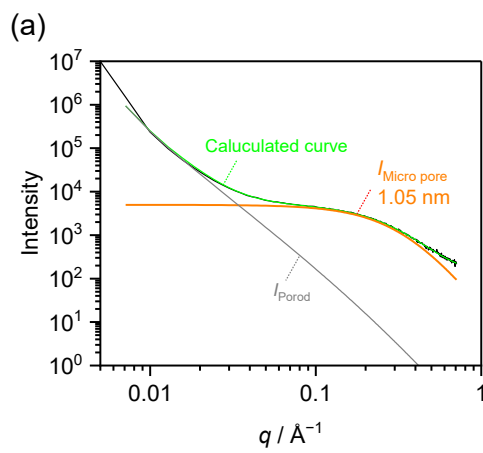

(b)

| Element | Ratio / wt. % | Ratio to C |
|---------|---------------|------------|
| C       | 95.37         | -          |
| H       | 0.56          | 0.006      |
| N       | 0.22          | 0.002      |
| S       | 1.08          | 0.011      |

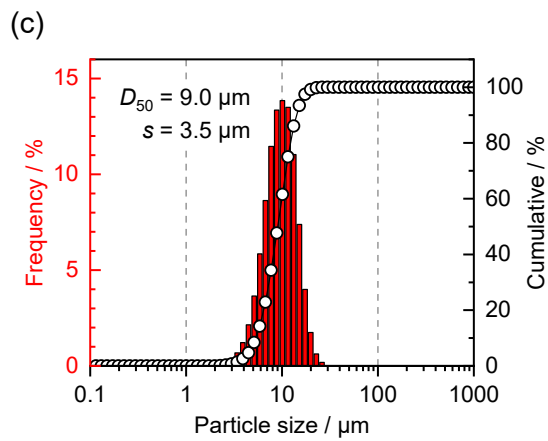

**Figure S2.** (a) Small angle X-ray scattering patterns and calculation line fitted by using NANO-Solver (Rigaku), (b) elemental composition and (c) particle-size distribution of the HC powders.

**Table S1.** Mass compositions of diluted HC-electrodes.

| HC-concentration | HC / mg | Al <sub>2</sub> O <sub>3</sub> / mg | PANa / mg | SWCNT(Lamfil) / mg | CMC (Lamfil) / mg |
|------------------|---------|-------------------------------------|-----------|--------------------|-------------------|
| 95 vol.%         | 72.20   | 0                                   | 3.25      | 0.4                | 0.6               |
| 40 vol.%         | 30.40   | 109.18                              | 3.25      | 0.4                | 0.6               |
| 10 vol.%         | 7.60    | 168.73                              | 3.25      | 0.4                | 0.6               |
| 5 vol.%          | 3.80    | 178.65                              | 3.25      | 0.4                | 0.6               |
| 2 vol.%          | 1.52    | 184.61                              | 3.25      | 0.4                | 0.6               |

(a) 95 vol.% HC

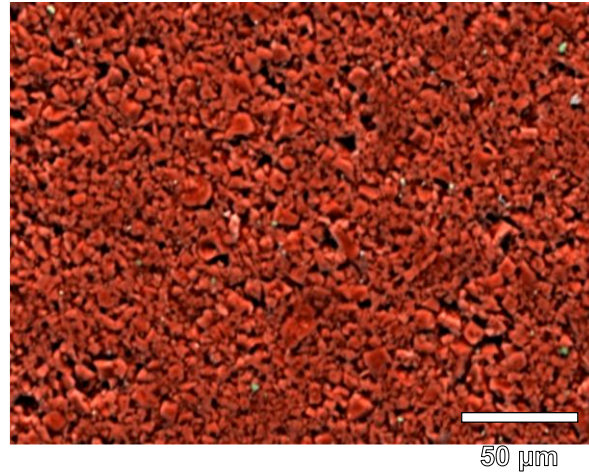

(b) 40 vol.% HC

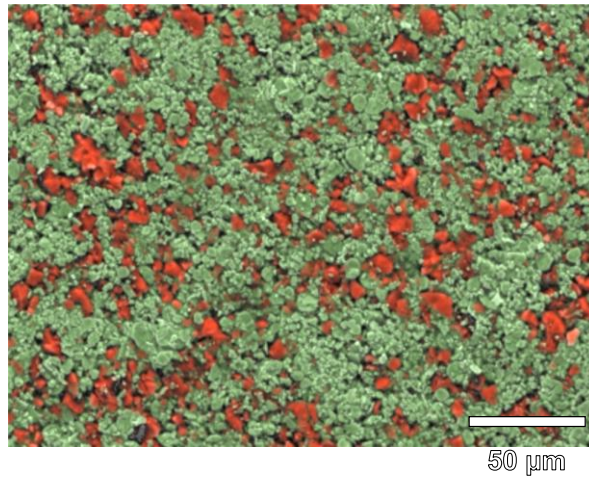

(c) 5 vol.%

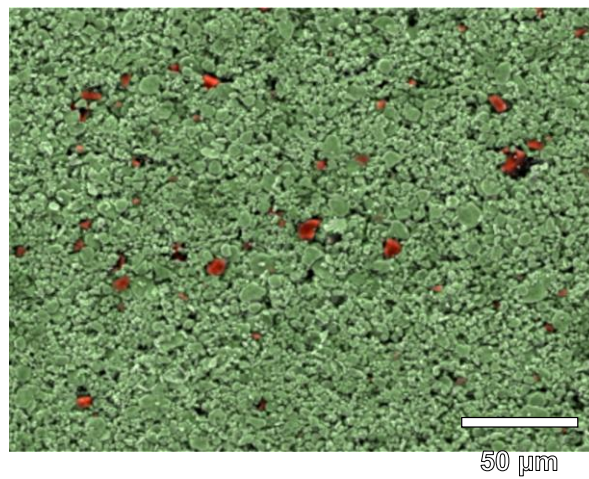

**Figure S3.** Images of SEM-EDX mapping of diluted electrodes with lower magnification. HC loadings were (a)95, (b)40, and (c) 5 vol.% of electrode volume. C and Al element were highlighted with red and green, respectively.

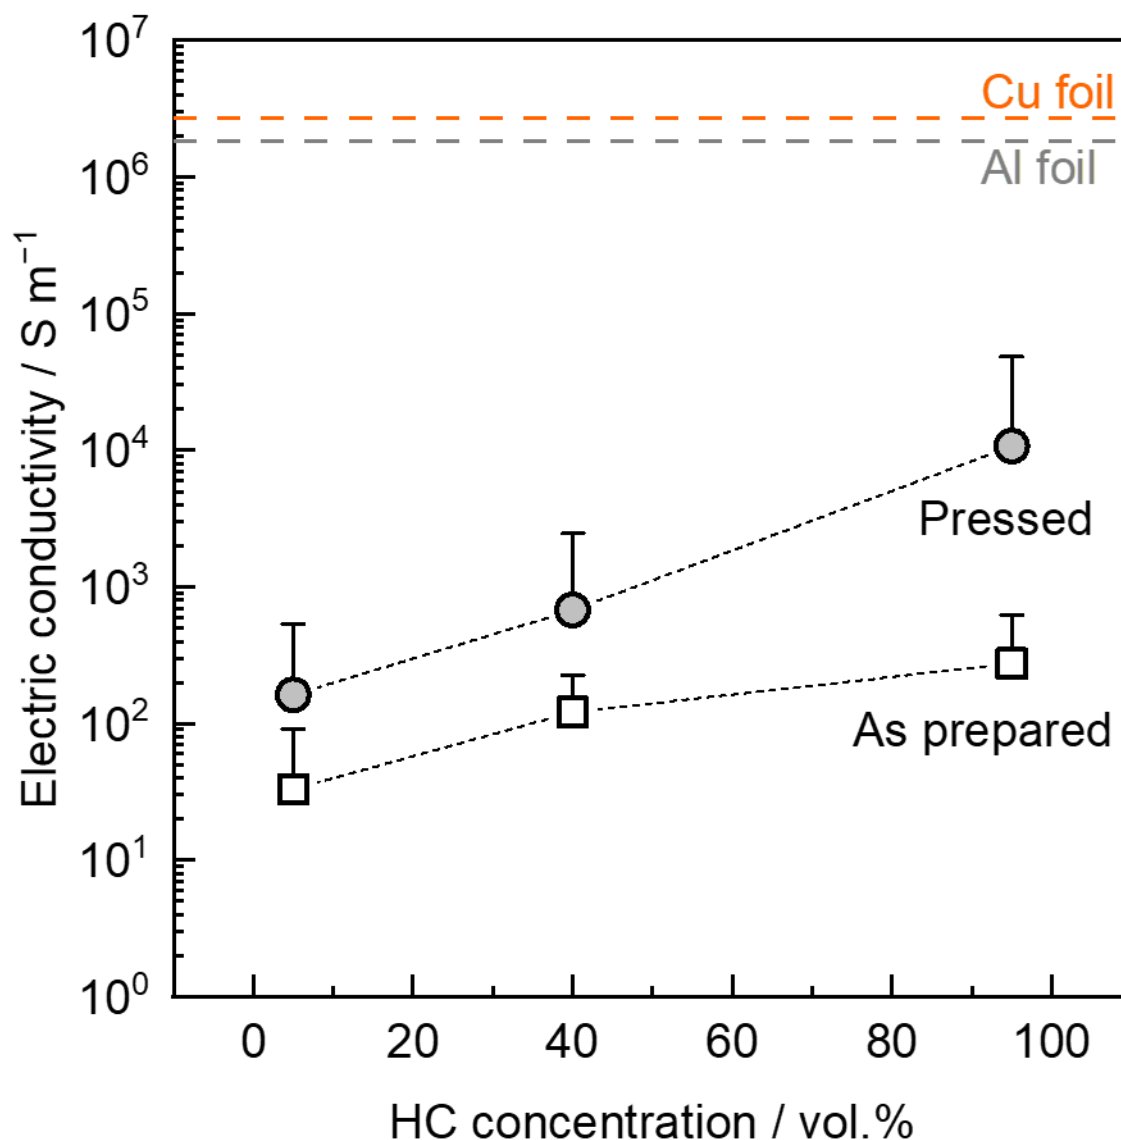

**Figure S4.** In-plane electronic conductivity of (un)diluted HC-electrodes. The values of electronic conductivity were calculated from resistance measured by a resistivity meter Loresta-GX (MCP-T700, Mitsubishi chemical analytech) with a PSP probe (RMH112, 1.5 mm pins-distance). Error bars show variety of electronic conductivity across an electrode sheet. Electrode pressing was performed prior to analysis by a single-axis press with ~100 MPa.

### Capacity correction for rate-capability

Capacity of SWCNT was estimated by eqn (S1) generated from rate-capability of 0 vol.% HC-electrode (95 vol.% Al<sub>2</sub>O<sub>3</sub>-electrode)

$$Q_{\text{SWCNT}}[\text{mAh cm}_{(\text{WE})}^{-3}] = A1 \exp\left(-\frac{i}{t1}\right) + A2 \exp\left(-\frac{i}{t2}\right) + A3 \exp\left(-\frac{i}{t3}\right) + y0 \quad (\text{S1})$$

$Q_{\text{SWCNT}}$  values for each cycle of diluted HC-electrode were estimated by using 0 vol.% HC-electrodes, which contained the same loading of SWCNT in the unit volume of composite electrode (Fig. S5a and b).  $Q_{\text{HC}}$  can be evaluated from eqn (S2) as a corrected capacity:

$$Q_{\text{HC}}[\text{mAh g}_{(\text{HC})}^{-1}] = (q_{\text{WE}} - Q_{\text{SWCNT}} \times V_{\text{composite electrode}} \times i_{\text{Reduction}}) / m_{\text{HC}} \quad (\text{S2})$$

Here,  $q_{\text{WE}}$  and  $i_{\text{Reduction}}$  are the actual capacities [mAh] and the applied current [A] for electrochemical reduction during rate capability test, respectively.  $V_{\text{composite electrode}}$  is volume of composite electrode which was evaluated by using thickness measured with a dial gauge (ID-S1012B, Mitsutoyo) and diameter of working electrode, i.e., 10 mm.  $m_{\text{HC}}$  is the mass of HC loaded in diluted electrode.

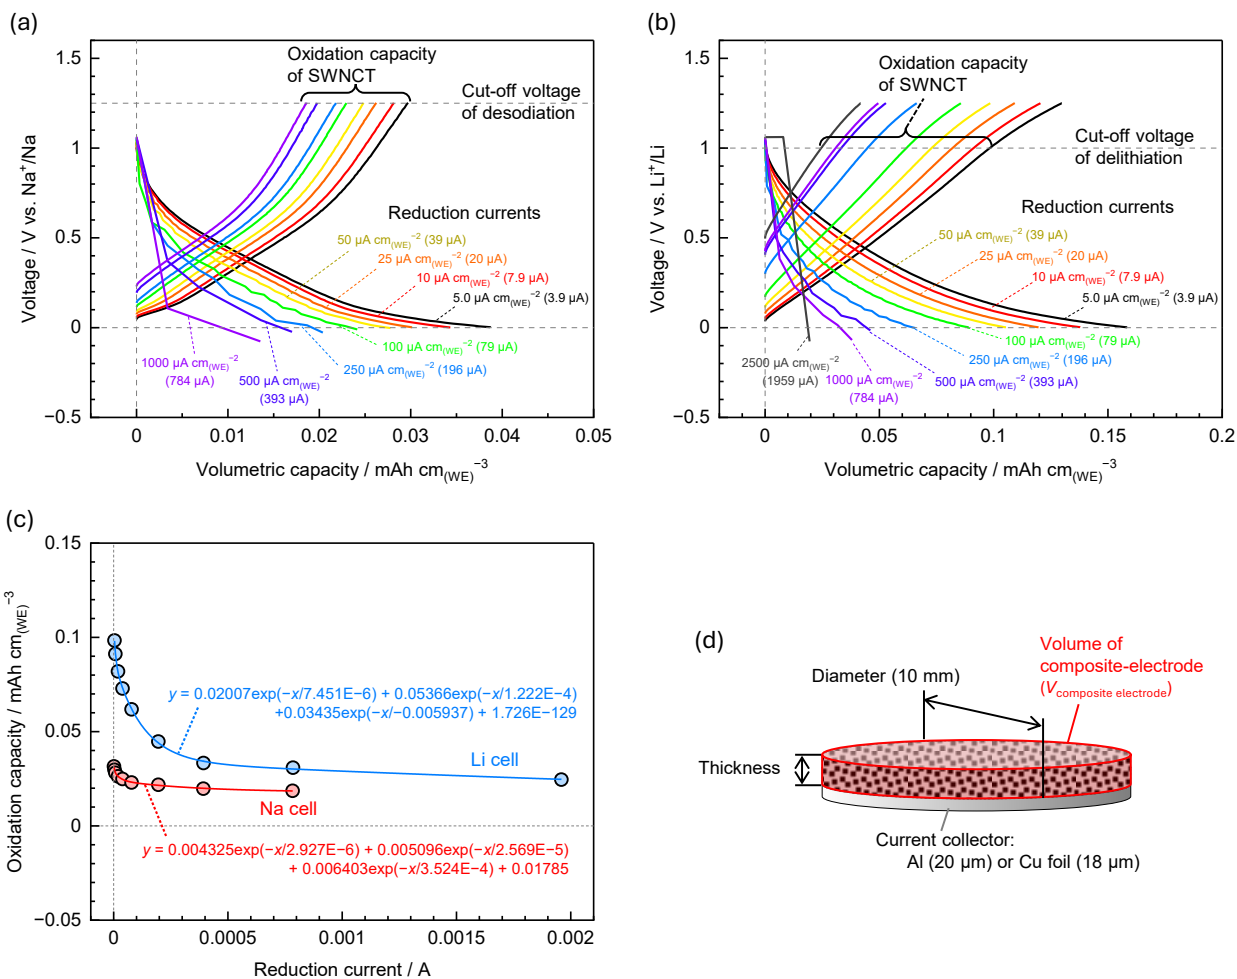

**Figure S5.** Charge/discharge curves of 0 vol.% HC-electrodes during rate-capability test for electrochemical reduction in (a) Na- and (b) Li-cell. (c) Rate capability of volumetric capacity as function of applied reduction current. (d) Schematic illustration of  $V_{\text{composite electrode}}$ .

**Table S2.** Capacities of diluted HC-electrodes obtained in Na- and Li-cells.

| Na 95 vol.%                                                                                        |          |                |                     |                                             |                   | Li 95 vol.%                                                                                        |          |                |                     |                                             |                   |
|----------------------------------------------------------------------------------------------------|----------|----------------|---------------------|---------------------------------------------|-------------------|----------------------------------------------------------------------------------------------------|----------|----------------|---------------------|---------------------------------------------|-------------------|
| (Thickness = 47.4 $\mu\text{m}$ , Volume = $3.72 \times 10^{-3} \text{ cm}^3$ , HC mass = 3.51 mg) |          |                |                     |                                             |                   | (Thickness = 40.2 $\mu\text{m}$ , Volume = $3.16 \times 10^{-3} \text{ cm}^3$ , HC mass = 3.05 mg) |          |                |                     |                                             |                   |
| Current /<br>mA g <sub>(HC)</sub> <sup>-1</sup>                                                    | WE / mAh | SWCNT /<br>mAh | Subtracted<br>/ mAh | HC /<br>mAh g <sub>(HC)</sub> <sup>-1</sup> | Normalized<br>/ % | Current /<br>mA g <sub>(HC)</sub> <sup>-1</sup>                                                    | WE / mAh | SWCNT /<br>mAh | Subtracted<br>/ mAh | HC /<br>mAh g <sub>(HC)</sub> <sup>-1</sup> | Normalized<br>/ % |
| 21.74                                                                                              | 0.8175   | 8.504E-4       | 0.8223              | 234.3                                       | 100.4             | 10                                                                                                 | 0.8726   | 0.00241        | 0.8702              | 285.3                                       | 103.9             |
| 22.36                                                                                              | 0.8185   | 8.484E-4       | 0.8238              | 234.7                                       | 100.5             | 25.75                                                                                              | 0.8395   | 0.001961       | 0.8376              | 274.6                                       | 100               |
| 25.02                                                                                              | 0.8141   | 8.399E-4       | 0.8206              | 233.8                                       | 100               | 50.16                                                                                              | 0.7332   | 0.001542       | 0.7317              | 239.9                                       | 87.36             |
| 50.11                                                                                              | 0.6211   | 7.669E-4       | 0.6068              | 172.9                                       | 76.28             | 64.26                                                                                              | 0.6561   | 0.00139        | 0.6547              | 214.7                                       | 78.17             |
| 55.78                                                                                              | 0.5704   | 7.521E-4       | 0.5696              | 162.3                                       | 70.04             | 128.9                                                                                              | 0.5369   | 0.001083       | 0.5359              | 175.7                                       | 63.98             |
| 112                                                                                                | 0.3397   | 6.343E-4       | 0.3411              | 97.19                                       | 41.68             | 257.5                                                                                              | 0.465    | 9.53E-4        | 0.464               | 152.1                                       | 55.4              |
| 223.7                                                                                              | 0.2926   | 5.035E-4       | 0.2914              | 83.02                                       | 35.89             | 642.6                                                                                              | 0.3672   | 7.796E-4       | 0.3664              | 120.1                                       | 43.74             |
| 558.1                                                                                              | 0.2474   | 4.068E-4       | 0.245               | 69.79                                       | 30.34             | 1289                                                                                               | 0.2714   | 5.594E-4       | 0.2708              | 88.8                                        | 32.34             |
| 1119                                                                                               | 0.141    | 3.974E-4       | 0.1388              | 39.53                                       | 17.25             | 2575                                                                                               | 0.1517   | 2.89E-4        | 0.1514              | 49.65                                       | 18.08             |
| 2236                                                                                               | 0.0598   | 3.972E-4       | 0.0552              | 15.73                                       | 7.271             |                                                                                                    |          |                |                     |                                             |                   |

| Na 40 vol.%                                                                                        |          |                |                     |                                             |                   | Li 40 vol.%                                                                                        |          |                |                     |                                             |                   |
|----------------------------------------------------------------------------------------------------|----------|----------------|---------------------|---------------------------------------------|-------------------|----------------------------------------------------------------------------------------------------|----------|----------------|---------------------|---------------------------------------------|-------------------|
| (Thickness = 42.6 $\mu\text{m}$ , Volume = $3.35 \times 10^{-3} \text{ cm}^3$ , HC mass = 1.21 mg) |          |                |                     |                                             |                   | (Thickness = 41.8 $\mu\text{m}$ , Volume = $3.28 \times 10^{-3} \text{ cm}^3$ , HC mass = 1.23 mg) |          |                |                     |                                             |                   |
| Current /<br>mA g <sub>(HC)</sub> <sup>-1</sup>                                                    | WE / mAh | SWCNT /<br>mAh | Subtracted<br>/ mAh | HC /<br>mAh g <sub>(HC)</sub> <sup>-1</sup> | Normalized<br>/ % | Current /<br>mA g <sub>(HC)</sub> <sup>-1</sup>                                                    | WE / mAh | SWCNT /<br>mAh | Subtracted<br>/ mAh | HC /<br>mAh g <sub>(HC)</sub> <sup>-1</sup> | Normalized<br>/ % |
| 16.2                                                                                               | 0.2906   | 8.163E-4       | 0.2929              | 242                                         | 101.1             | 12.2                                                                                               | 0.3839   | 0.002771       | 0.3811              | 309.8                                       | 107.9             |
| 25.05                                                                                              | 0.2875   | 8.046E-4       | 0.289               | 238.8                                       | 100               | 24.4                                                                                               | 0.3556   | 0.002512       | 0.3531              | 287                                         | 100               |
| 32.49                                                                                              | 0.2853   | 7.964E-4       | 0.2861              | 236.5                                       | 99.25             | 48.79                                                                                              | 0.3099   | 0.002195       | 0.3077              | 250.2                                       | 87.15             |
| 50.1                                                                                               | 0.2803   | 7.776E-4       | 0.2808              | 232.1                                       | 97.53             | 122                                                                                                | 0.2467   | 0.001616       | 0.2451              | 199.2                                       | 69.42             |
| 64.89                                                                                              | 0.274    | 7.625E-4       | 0.2744              | 226.8                                       | 95.33             | 244                                                                                                | 0.2049   | 0.001223       | 0.2037              | 165.6                                       | 57.7              |
| 161.9                                                                                              | 0.2288   | 6.759E-4       | 0.2289              | 189.1                                       | 79.57             | 487.9                                                                                              | 0.1749   | 0.001032       | 0.1739              | 141.4                                       | 49.25             |
| 324.8                                                                                              | 0.1405   | 5.701E-4       | 0.1398              | 115.6                                       | 48.8              | 1220                                                                                               | 0.1401   | 8.758E-4       | 0.1392              | 113.2                                       | 39.43             |
| 648.8                                                                                              | 0.0993   | 4.526E-4       | 0.09855             | 81.44                                       | 34.43             | 2440                                                                                               | 0.1103   | 6.803E-4       | 0.1096              | 89.1                                        | 31.04             |
| 1619                                                                                               | 0.0739   | 3.656E-4       | 0.07223             | 59.7                                        | 25.57             | 4878                                                                                               | 0.07562  | 4.105E-4       | 0.07521             | 61.15                                       | 21.3              |
| 3248                                                                                               | 0.0463   | 3.571E-4       | 0.04384             | 36.23                                       | 15.95             |                                                                                                    |          |                |                     |                                             |                   |
| 6488                                                                                               | 0.0152   | 3.57E-4        | 0.01054             | 8.713                                       | 5.095             |                                                                                                    |          |                |                     |                                             |                   |

| Na 10 vol.%<br>(Thickness = 42 $\mu\text{m}$ , Volume = $3.30 \times 10^{-3} \text{ cm}^3$ , HC mass = 0.29 mg) |          |                |                     |                                         |                   | Li 10 vol.%<br>(Thickness = 40.6 $\mu\text{m}$ , Volume = $3.19 \times 10^{-3} \text{ cm}^3$ , HC mass = 0.31 mg) |          |                |                     |                                         |                   |
|-----------------------------------------------------------------------------------------------------------------|----------|----------------|---------------------|-----------------------------------------|-------------------|-------------------------------------------------------------------------------------------------------------------|----------|----------------|---------------------|-----------------------------------------|-------------------|
| Current /<br>$\text{mA g}_{\text{HC}}^{-1}$                                                                     | WE / mAh | SWCNT /<br>mAh | Subtracted<br>/ mAh | HC /<br>$\text{mAh g}_{\text{HC}}^{-1}$ | Normalized<br>/ % | Current /<br>$\text{mA g}_{\text{HC}}^{-1}$                                                                       | WE / mAh | SWCNT /<br>mAh | Subtracted<br>/ mAh | HC /<br>$\text{mAh g}_{\text{HC}}^{-1}$ | Normalized<br>/ % |
| 25.18                                                                                                           | 0.0698   | 8.814E-4       | 0.07222             | 249                                     | 100               | 24.93                                                                                                             | 0.0976   | 0.002933       | 0.09467             | 310.4                                   | 100               |
| 27.25                                                                                                           | 0.0699   | 8.701E-4       | 0.07153             | 246.7                                   | 100.2             | 49.84                                                                                                             | 0.0968   | 0.002687       | 0.09411             | 308.6                                   | 99.39             |
| 49.97                                                                                                           | 0.0696   | 8.16E-4        | 0.07018             | 242                                     | 99.78             | 64.3                                                                                                              | 0.09187  | 0.002595       | 0.08927             | 292.7                                   | 94.24             |
| 67.55                                                                                                           | 0.06938  | 8.049E-4       | 0.0697              | 240.3                                   | 99.48             | 100                                                                                                               | 0.0835   | 0.002434       | 0.08107             | 265.8                                   | 85.56             |
| 135.6                                                                                                           | 0.0685   | 7.851E-4       | 0.06861             | 236.6                                   | 98.29             | 128.9                                                                                                             | 0.0772   | 0.002332       | 0.07487             | 245.5                                   | 78.99             |
| 270.8                                                                                                           | 0.0663   | 7.517E-4       | 0.06625             | 228.4                                   | 95.16             | 257.6                                                                                                             | 0.0644   | 0.001981       | 0.06242             | 204.7                                   | 65.79             |
| 675.5                                                                                                           | 0.0565   | 6.664E-4       | 0.05623             | 193.9                                   | 81.01             | 643.3                                                                                                             | 0.0496   | 0.001403       | 0.0482              | 158                                     | 50.67             |
| 1356                                                                                                            | 0.03722  | 5.62E-4        | 0.03674             | 126.7                                   | 53.09             | 1290                                                                                                              | 0.0394   | 0.001094       | 0.03831             | 125.6                                   | 40.19             |
| 2708                                                                                                            | 0.0244   | 4.461E-4       | 0.02355             | 81.22                                   | 34.54             | 2576                                                                                                              | 0.029    | 9.623E-4       | 0.02804             | 91.93                                   | 29.28             |
| 6755                                                                                                            | 0.0162   | 3.605E-4       | 0.01484             | 51.17                                   | 22.67             | 6439                                                                                                              | 0.015    | 7.869E-4       | 0.01421             | 46.6                                    | 14.57             |
| 1.356E4                                                                                                         | 0.00829  | 3.521E-4       | 0.006198            | 21.37                                   | 11.18             | 1.29E4                                                                                                            | 0.0076   | 5.646E-4       | 0.007035            | 23.07                                   | 7.048             |

| Na 5 vol.%<br>(Thickness = 42 $\mu\text{m}$ , Volume = $3.30 \times 10^{-3} \text{ cm}^3$ , HC mass = 0.15 mg) |          |                |                     |                                         |                   | Li 5 vol.%<br>(Thickness = 41.8 $\mu\text{m}$ , Volume = $3.28 \times 10^{-3} \text{ cm}^3$ , HC mass = 0.15 mg) |          |                |                     |                                         |                   |
|----------------------------------------------------------------------------------------------------------------|----------|----------------|---------------------|-----------------------------------------|-------------------|------------------------------------------------------------------------------------------------------------------|----------|----------------|---------------------|-----------------------------------------|-------------------|
| Current /<br>$\text{mA g}_{\text{HC}}^{-1}$                                                                    | WE / mAh | SWCNT /<br>mAh | Subtracted<br>/ mAh | HC /<br>$\text{mAh g}_{\text{HC}}^{-1}$ | Normalized<br>/ % | Current /<br>$\text{mA g}_{\text{HC}}^{-1}$                                                                      | WE / mAh | SWCNT /<br>mAh | Subtracted<br>/ mAh | HC /<br>$\text{mAh g}_{\text{HC}}^{-1}$ | Normalized<br>/ % |
| 25.34                                                                                                          | 0.03557  | 0.001004       | 0.03598             | 239.9                                   | 100               | 25.34                                                                                                            | 0.04716  | 0.00323        | 0.04393             | 292.9                                   | 100               |
| 50.01                                                                                                          | 0.03549  | 8.774E-4       | 0.0353              | 235.3                                   | 99.91             | 50.01                                                                                                            | 0.04541  | 0.003024       | 0.04239             | 282.6                                   | 96.48             |
| 100                                                                                                            | 0.03515  | 8.143E-4       | 0.03487             | 232.5                                   | 99.07             | 100                                                                                                              | 0.0394   | 0.002771       | 0.03663             | 244.2                                   | 83.37             |
| 250.1                                                                                                          | 0.03416  | 7.868E-4       | 0.03383             | 225.5                                   | 96.39             | 250.1                                                                                                            | 0.03067  | 0.002421       | 0.02825             | 188.3                                   | 64.29             |
| 500.1                                                                                                          | 0.03183  | 7.546E-4       | 0.03144             | 209.6                                   | 89.8              | 500.1                                                                                                            | 0.02496  | 0.002067       | 0.0229              | 152.6                                   | 52.11             |
| 999.3                                                                                                          | 0.02571  | 6.974E-4       | 0.02512             | 167.5                                   | 72.24             | 999.3                                                                                                            | 0.02012  | 0.001616       | 0.01851             | 123.4                                   | 42.12             |
| 2501                                                                                                           | 0.01403  | 5.699E-4       | 0.0133              | 88.68                                   | 38.67             | 2501                                                                                                             | 0.01281  | 0.001141       | 0.01167             | 77.78                                   | 26.56             |
| 5002                                                                                                           | 0.01033  | 4.531E-4       | 0.009393            | 62.62                                   | 28.08             | 5002                                                                                                             | 0.008185 | 9.977E-4       | 0.007187            | 47.92                                   | 16.36             |
| 9987                                                                                                           | 0.006446 | 3.739E-4       | 0.004901            | 32.68                                   | 16.93             | 9987                                                                                                             | 0.003969 | 8.763E-4       | 0.003093            | 20.62                                   | 7.041             |
| 2.325E4                                                                                                        | 0.003678 | 3.523E-4       | 0.001626            | 10.84                                   | 8.931             | 2.325E4                                                                                                          | 0.002914 | 6.268E-4       | 0.002287            | 15.25                                   | 5.206             |

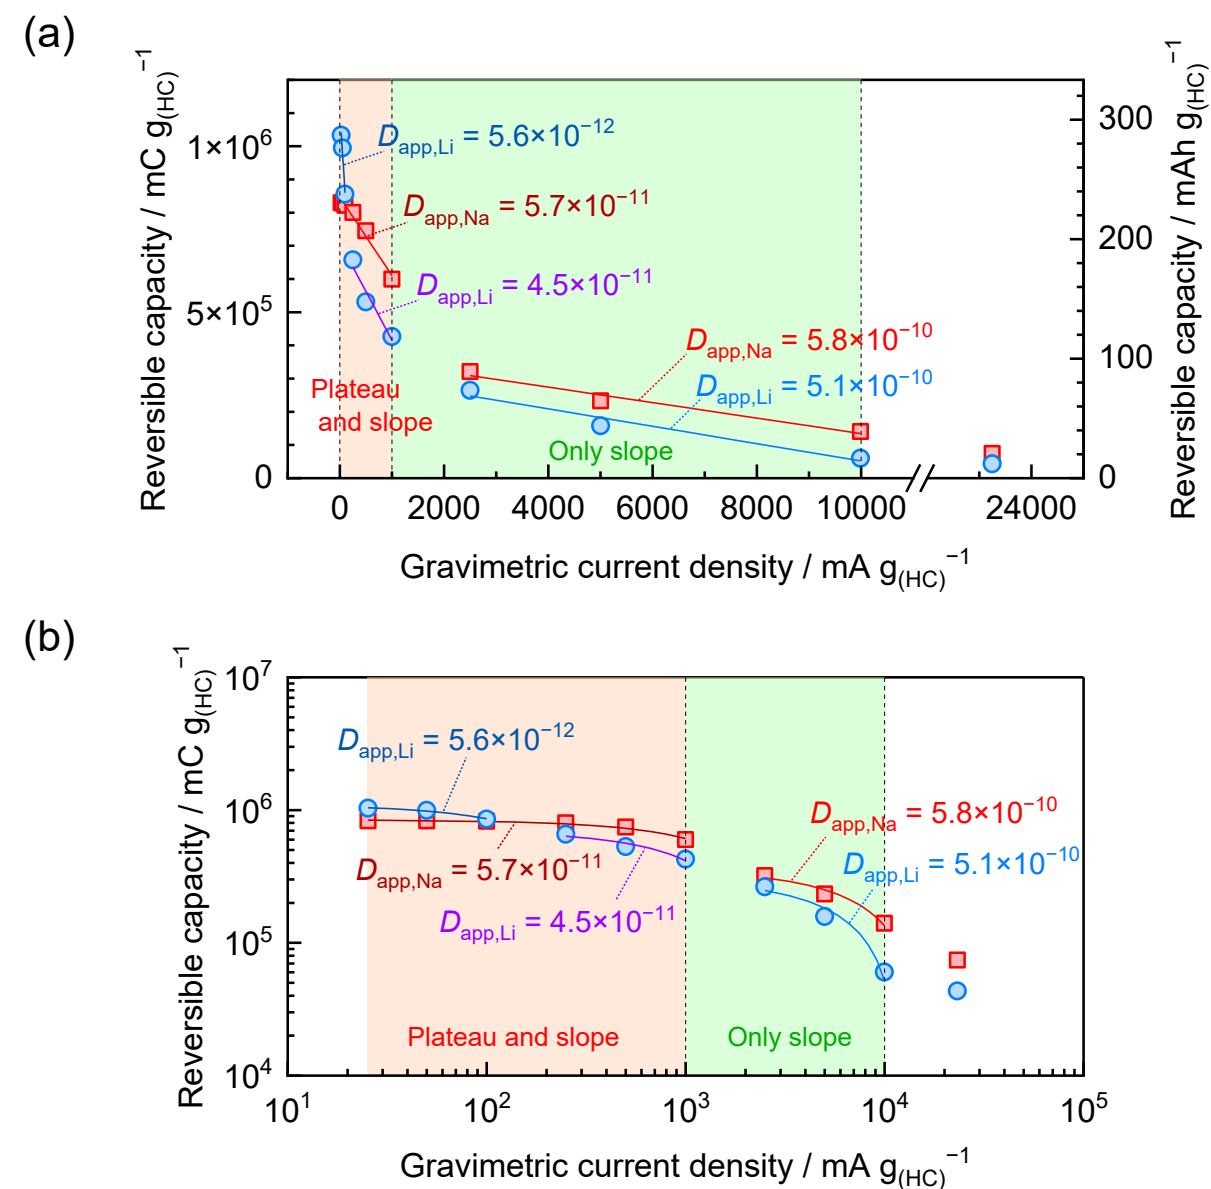

(c)

| Sodiation                                    |                                                            | Lithiation                                   |                                                            |
|----------------------------------------------|------------------------------------------------------------|----------------------------------------------|------------------------------------------------------------|
| Current / mA g <sub>(HC)</sub> <sup>-1</sup> | $D_{app}$ ( $\pm$ Error) / cm <sup>2</sup> s <sup>-1</sup> | Current / mA g <sub>(HC)</sub> <sup>-1</sup> | $D_{app}$ ( $\pm$ Error) / cm <sup>2</sup> s <sup>-1</sup> |
| 25–1000                                      | $5.7 \times 10^{-11}$ ( $\pm 3.1 \times 10^{-11}$ )        | 25–100                                       | $5.6 \times 10^{-12}$ ( $\pm 3.1 \times 10^{-10}$ )        |
|                                              |                                                            | 250–1000                                     | $4.5 \times 10^{-11}$ ( $\pm 2.5 \times 10^{-11}$ )        |
| 2500–10000                                   | $5.8 \times 10^{-10}$ ( $\pm 3.2 \times 10^{-10}$ )        | 2500–10000                                   | $5.1 \times 10^{-10}$ ( $\pm 2.8 \times 10^{-10}$ )        |

**Figure S6.** Rate-capabilities and  $D_{app}$  for Na- and Li-insertion of 5 vol.% HC-electrodes with horizontal axis of current in (a) linear and (b) logarithm.  $D_{app}$  was estimated by eqn (1) in main text using slope in (a). (c) Summary of  $D_{app}$  values with error attributed to the particle size distribution of HC.

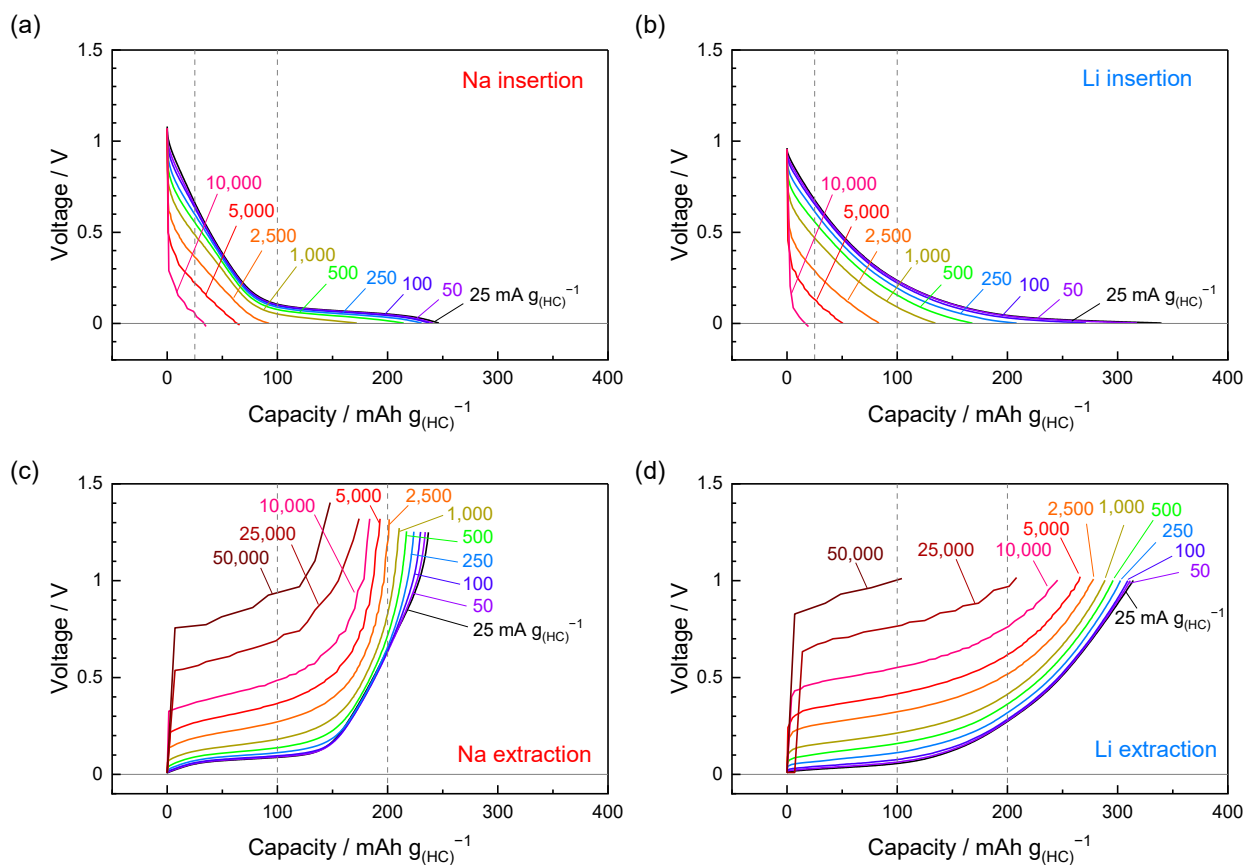

**Figure S7.** Galvanostatic charge-discharge curves during rate-performance testing of 5 vol.% HC-electrode in Na- and Li-cell. Tests were performed for (a) sodiation, (b) lithiation, (c) desodiation, and (d) delithiation, respectively. The applied current for opposite process was fixed to 25 mA  $g^{-1}$  in each test.

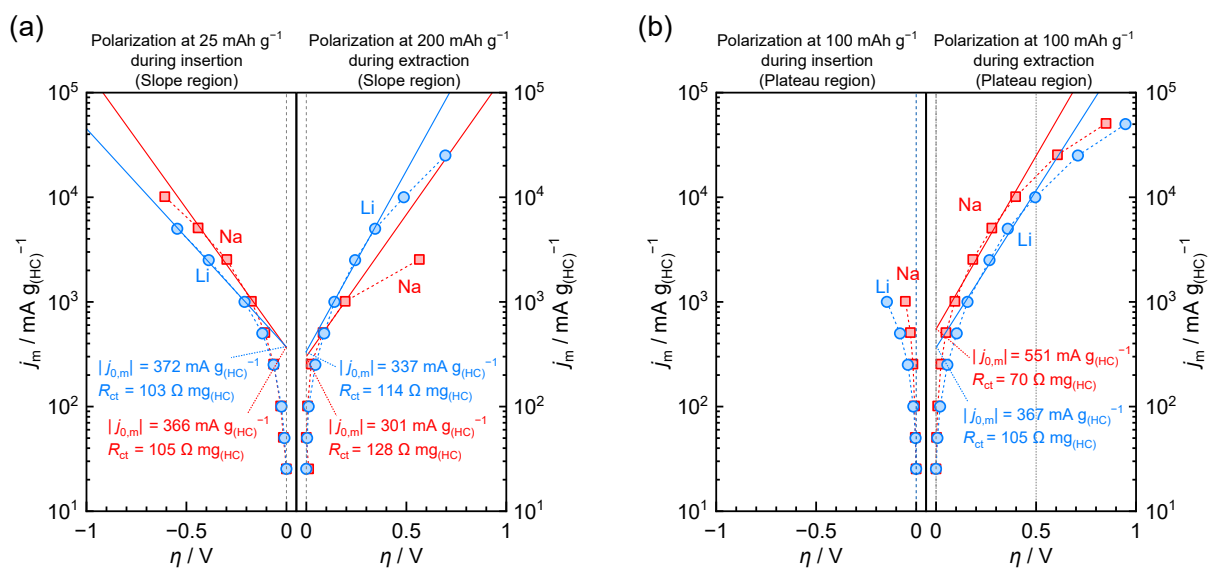

**Figure S8.** Tafel plots prepared by using polarization at (a) slope region at 25 mA h<sup>-1</sup> during insertion and 200 mA h<sup>-1</sup> during extraction and (b) plateau region at 100 mA h<sup>-1</sup> during insertion and 100 mA h<sup>-1</sup> during extraction in Fig. S2. The plot of Na-cell (□) and Li-cell (○) were obtained by voltage-subtraction from charge-discharge curves at lower currents.

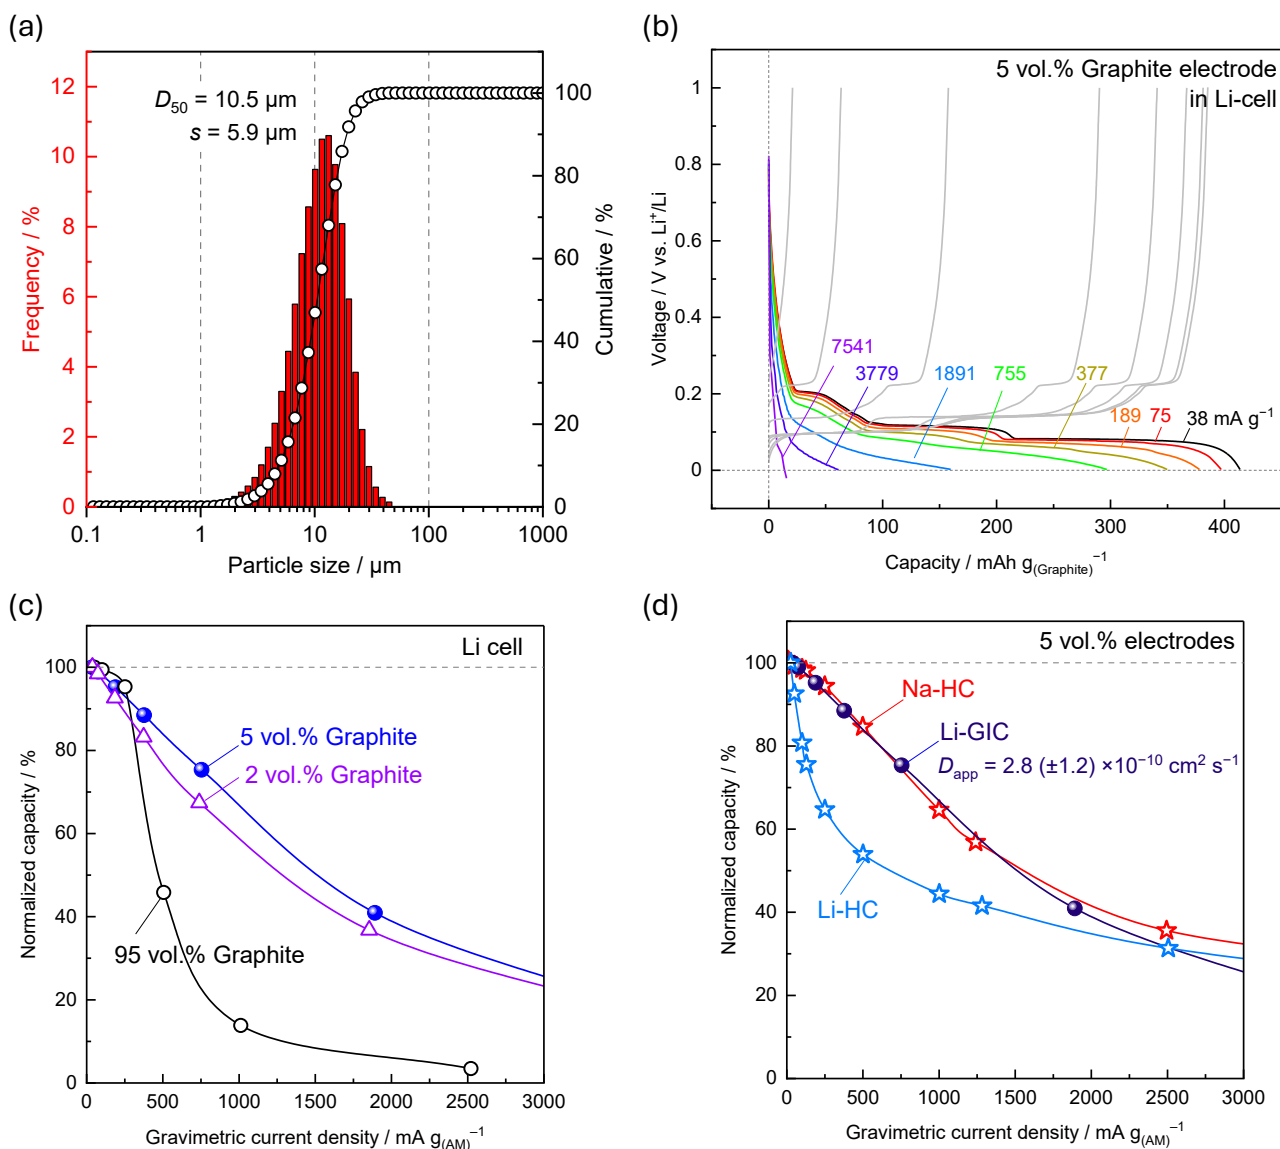

**Figure S9.** Lithium intercalation into diluted graphite-electrodes in Li-half cell using conventional electrolyte, 1 M LiPF<sub>6</sub> EC:DMC (1:1 v/v) with 2 vol.% adding fluoroethylene carbonate (FEC). (a) Particle size distribution of the graphite powder. (b) Galvanostatic charge-discharge curves of 5 vol.% graphite-electrode during rate-capability testing for lithium-intercalation. (c) Rate-capabilities of diluted electrodes having various graphite concentrations. (d) Rate-capabilities of Na-/Li-insertion into 5 vol.% HC-electrodes and Li-intercalation into 5 vol.% graphite-electrodes.

Relating to the diffusion dimensionality, eqn (1) for estimation of  $D_{app}$  was slightly change as eqn (S3):<sup>5</sup>

$$Q = \frac{Ca}{3} - \frac{a^2}{8D_{app}} j_m \quad (S3)$$

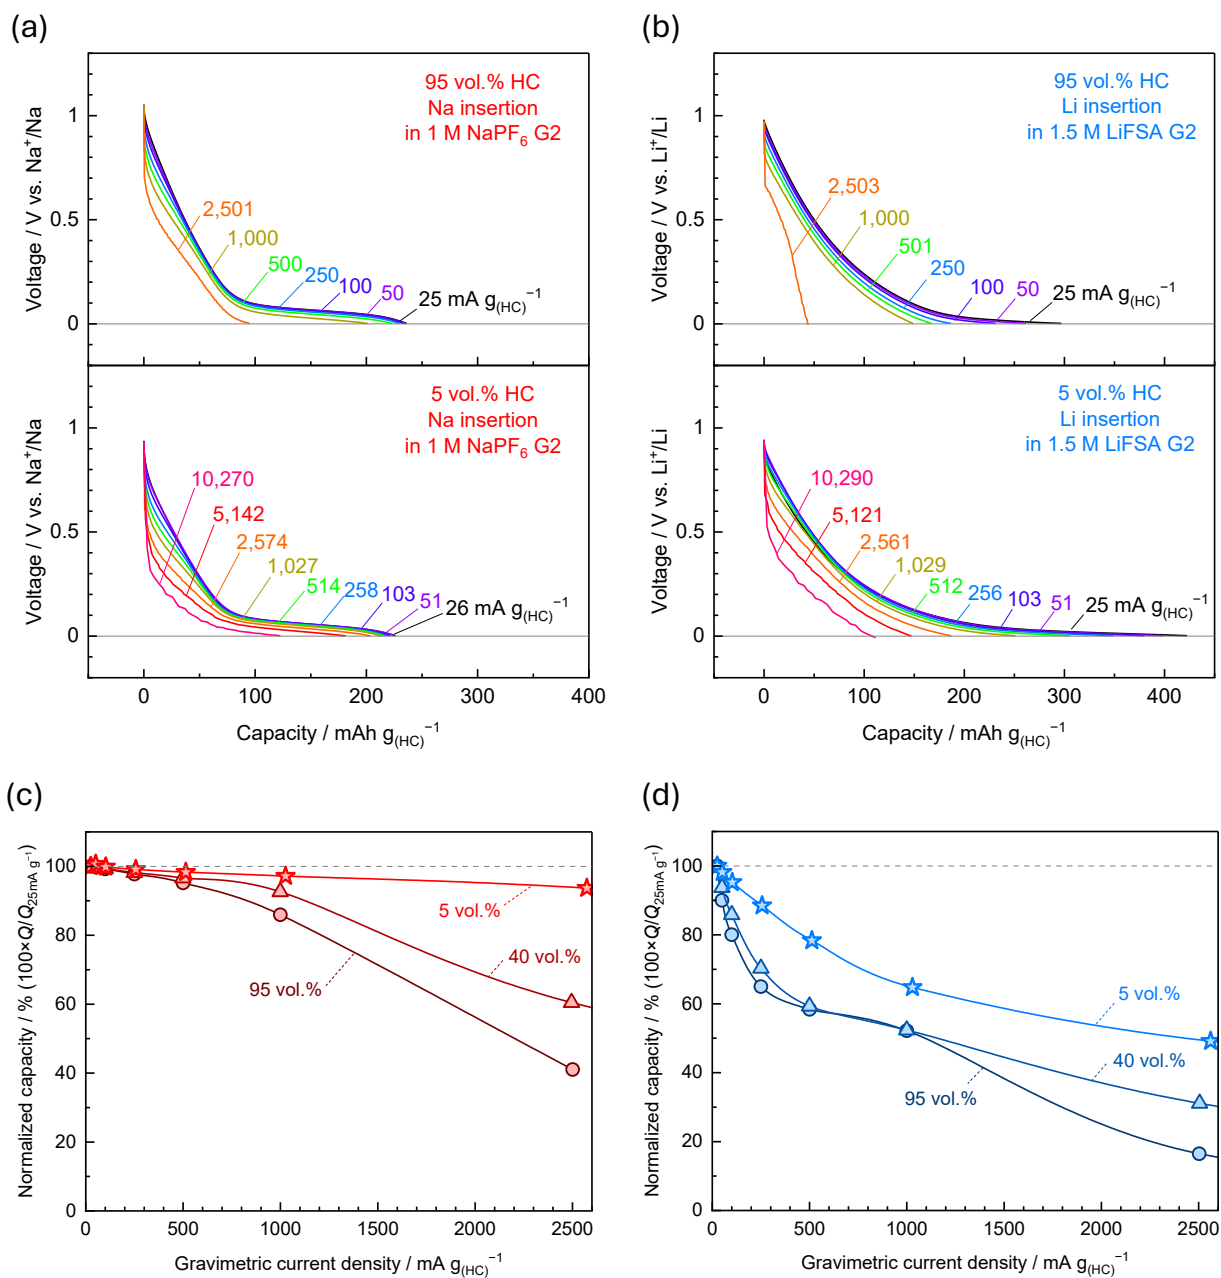

**Figure S10.** Rate capability test in ether-based electrolyte. Sodiation/lithiation curves of HC electrodes in (a) Na-cells with 1 M  $\text{NaPF}_6$  in G2 and (b) Li-cells with 1.5 M lithium bis(fluorosulfonyl)amide in G2, respectively. Rate capabilities of (c) sodiation and (d) lithiation as a function of applied current.

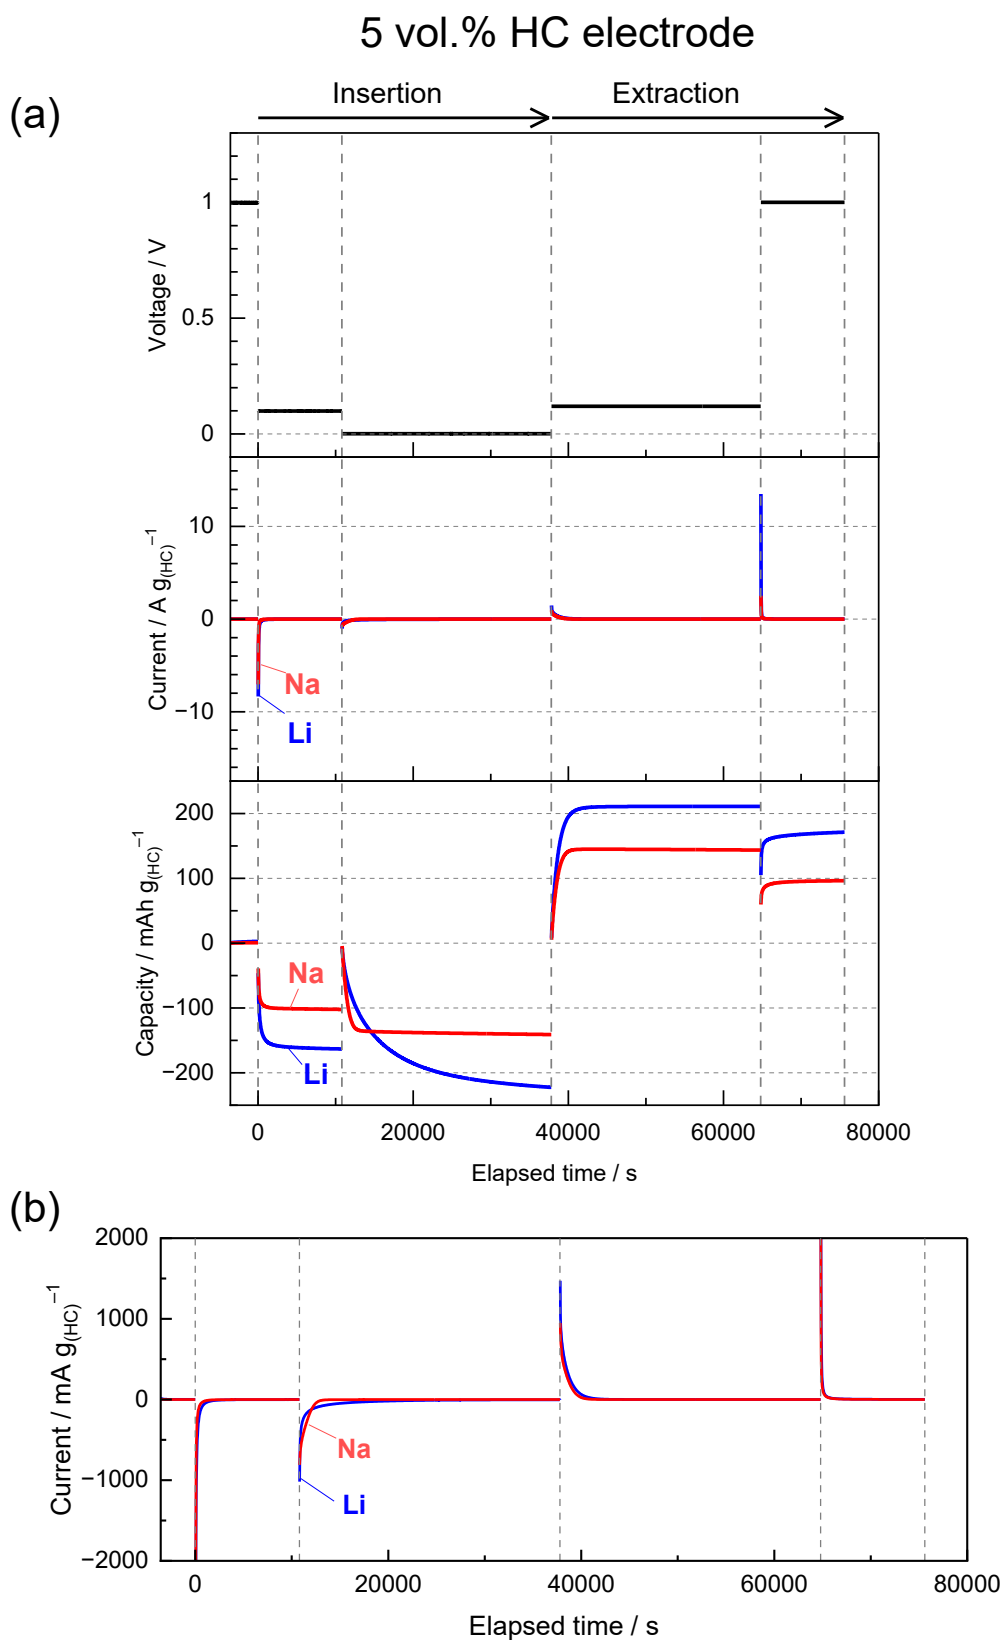

**Figure S11.** PSCA result of 5 vol.% HC-electrode in Na- and Li-cell. (a) Potential, current, and capacity were shown in top, middle, and bottom panel in the above graph, respectively. (b) Magnified current from (a) to compare at long times of 15000–60000 s.

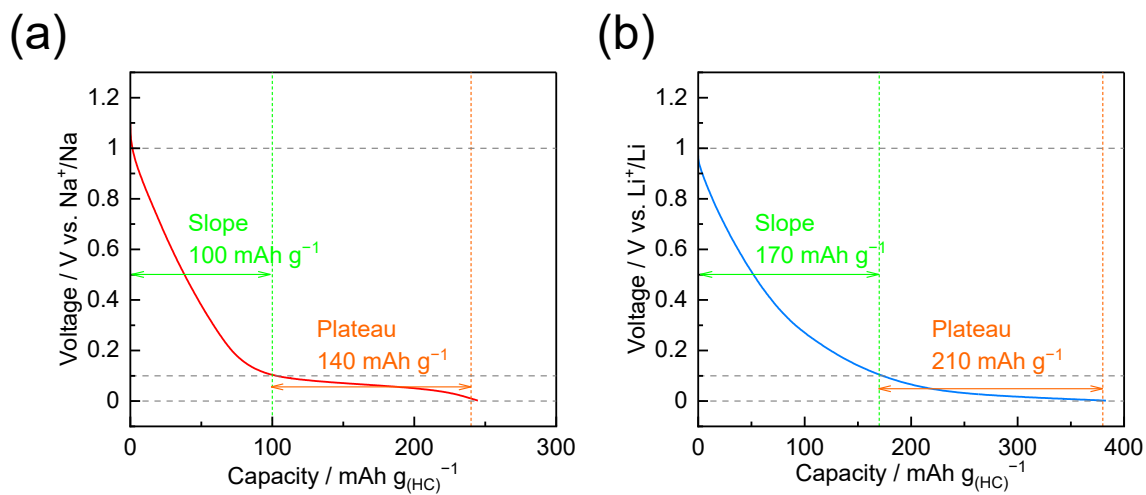

**Figure S12.** Slope- and plateau-capacity of HC during galvanostatic charge-discharge,  $Q_{\text{GCD}}$ , in (a) Na- and (b) Li-cell at  $25 \text{ mA g}^{-1}$ . Slope capacity was defined between 1.0 V and 0.1 V, and the plateau capacity was defined between 0.1 V and 2 mV.

**Table S3.** Characteristic time, Tau ( $\tau$ ) from the chronocoulogram of 5 vol.% HC-electrode in Na- and Li-cells.  $\tau$  is evaluated from the time at which the cell reaches 63.2 % of the slope-/plateau-capacity.

| Temperature / °C | $\tau_{\text{Na,slope}} / \text{S}$ | $\tau_{\text{Na,plateau}} / \text{S}$ | $\tau_{\text{Li,slope}} / \text{S}$ | $\tau_{\text{Li,plateau}} / \text{S}$ |
|------------------|-------------------------------------|---------------------------------------|-------------------------------------|---------------------------------------|
| 40               | 24                                  | 206                                   | 56                                  | 1013                                  |
| 30               | 50                                  | 433                                   | 113                                 | 2157                                  |
| 25               | 63                                  | 677                                   | 169                                 | 3499                                  |
| 20               | 87                                  | 953                                   | 257                                 | 5419                                  |
| 10               | 244                                 | 1817                                  | 812                                 | 14760                                 |

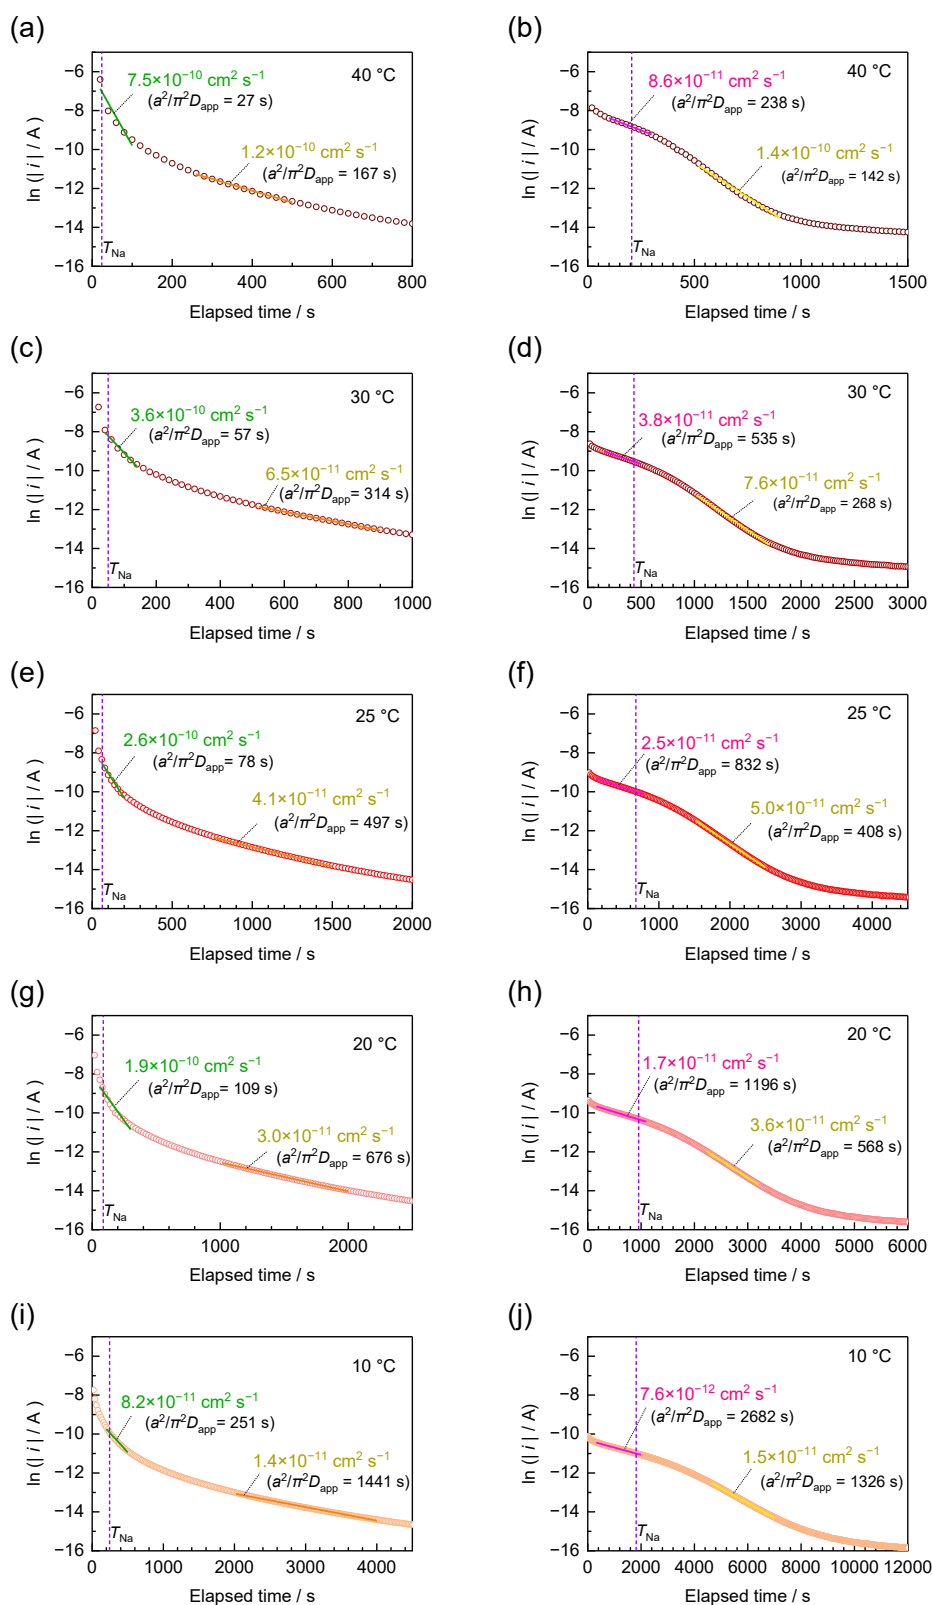

**Figure S13.** Chronoamperograms during sodiation in 5 vol.% electrodes. Potential step for slope region (from 1.0 V to 0.1 V) and plateau region (from 0.1 V to 2 mV) were carried out, sequentially at (a)-(b) 40 °C, (c)-(d) 30 °C, (e)-(f) 25 °C, (g)-(h) 20 °C, and (i)-(j) 10 °C, respectively.  $D_{app}$  were estimated using two time-regions, one near the  $\tau_{Na}$  shown in Table S4 and the other after the diffusion characteristic time,  $a^2/\pi^2 D_{app}$ . These are referred to as  $D_{app,\tau}$  and  $D_{app,late}$  in the main text.

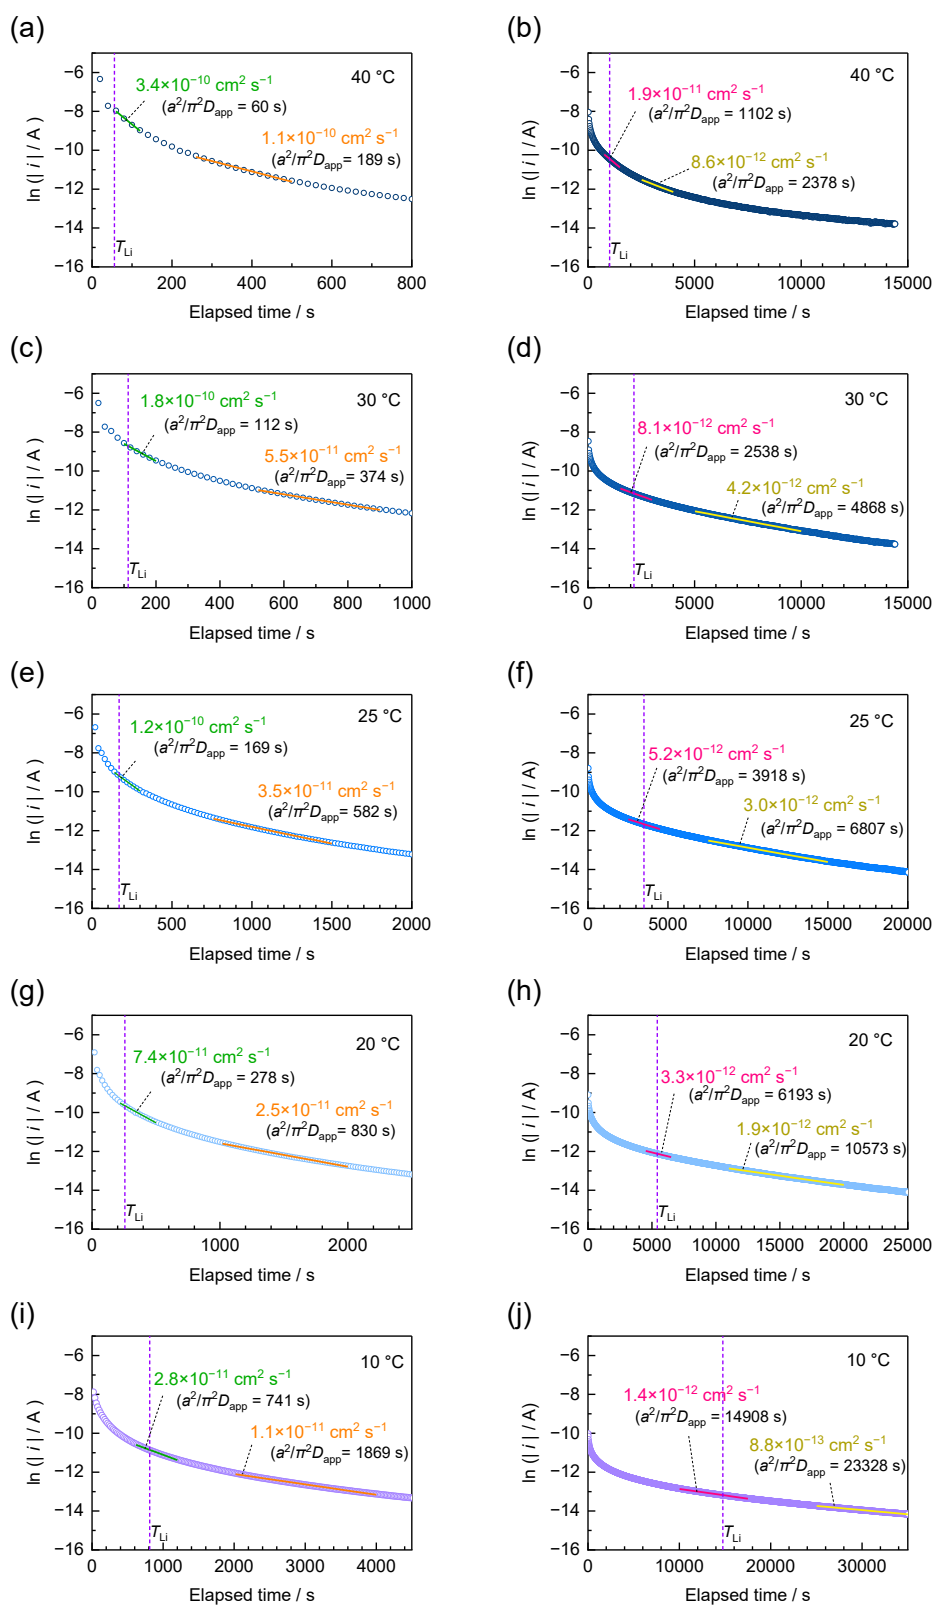

**Figure S14.** Chronoamperograms during lithiation in 5 vol.% electrode. Potential step for slope region (from 1.0 V to 0.1 V) and plateau region (from 0.1 V to 2 mV) were carried out, sequentially at (a)-(b) 40 °C, (c)-(d) 30 °C, (e)-(f) 25 °C, (g)-(h) 20 °C, and (i)-(j) 10 °C, respectively.  $D_{app}$  were estimated using two time-regions with one near the  $\tau_{Li}$  shown in Table S4 and the other after diffusion characteristic time,  $a^2/\pi^2 D_{app}$ . These are referred to as  $D_{app,\tau}$  and  $D_{app,late}$  in the manuscript.

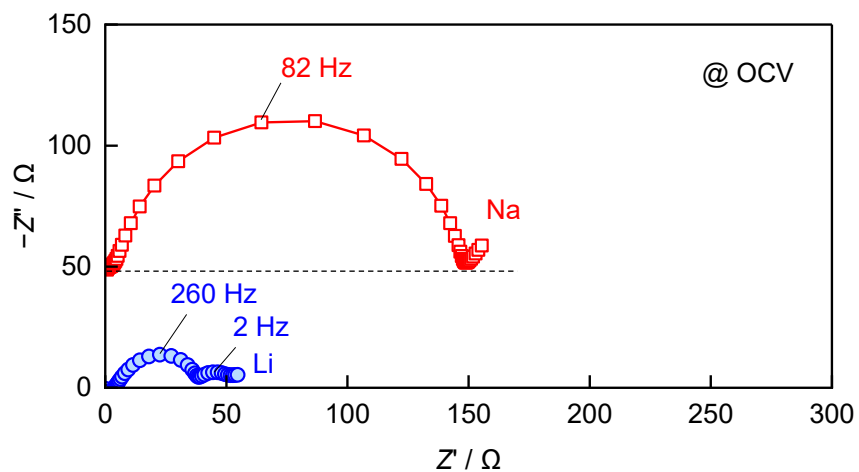

**Figure S15.** Nyquist plots of electrochemical impedance of Na and Li metal electrodes. These impedances were obtained by dividing  $Z'$  and  $-Z''$  of Na//Na cell and Li//Li cell by 2, respectively, to compare with half-cells consisting of HC-electrode. Nyquist plots of Na have been vertically shifted to 50  $\Omega$  for visibility.

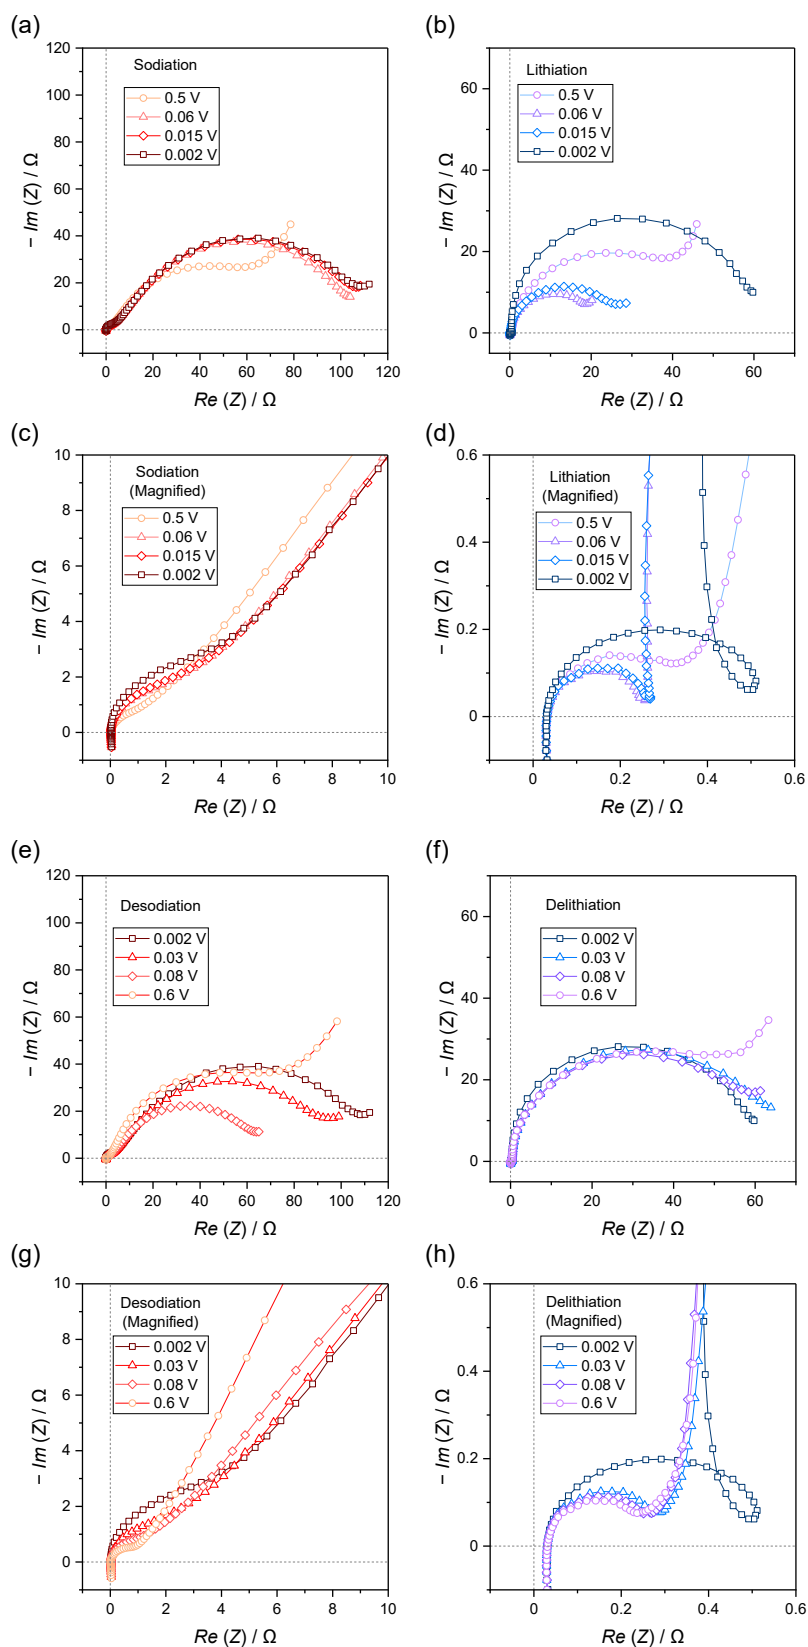

**Figure S16.** Nyquist plots of thick 40 vol.% HC-electrode in 3-electrodes cells. Electrode thickness were 65  $\mu\text{m}$  and 74  $\mu\text{m}$  for Na- and Li-cell, respectively. Impedance were measured from 1 MHz to 10 mHz during (a) sodiation, (b)lithiation, (c) desodiation, and (d) delithiation. High magnification of higher frequency region  $> 1\text{Hz}$  during are shown in (e)–(h). Squidstat Plus (Admiral Instruments) was used as a potentiostat and an impedance analyzer.

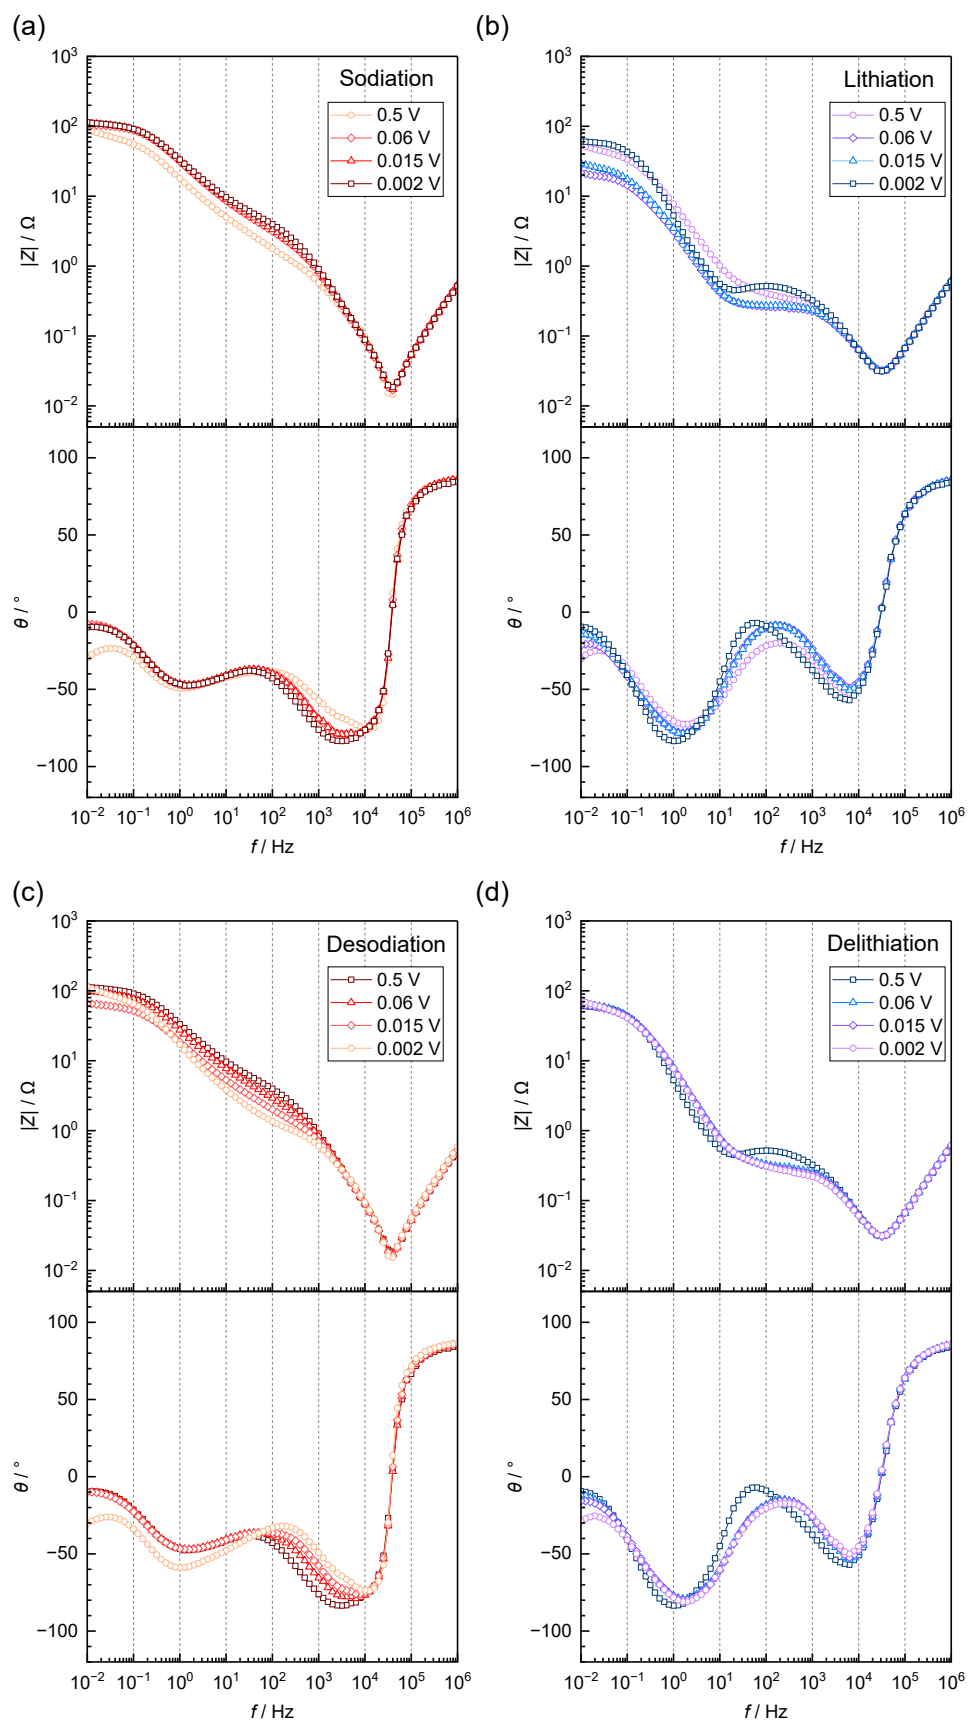

**Figure S17.** Bode plots of thick 40 vol.% HC-electrode in 3-electrodes cells during (a) sodiation, (b)lithiation, (c) desodiation, and (d) delithiation corresponding to Fig. S16.

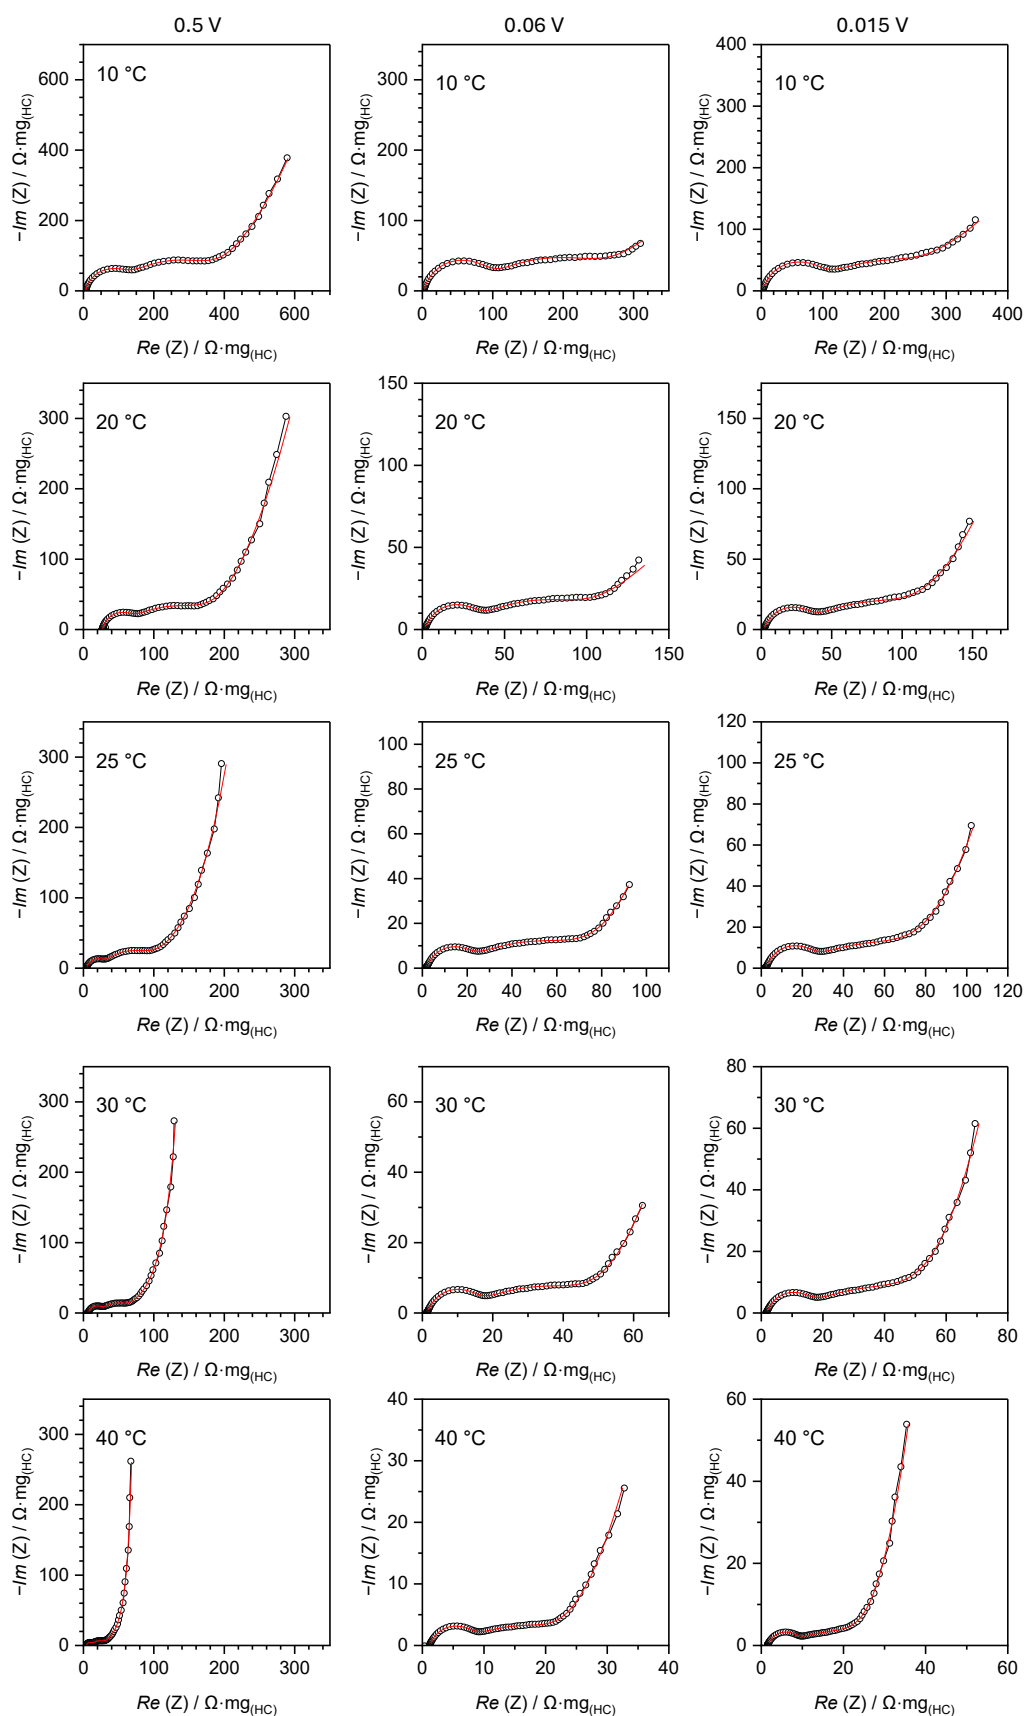

**Figure S18.** Nyquist plots of electrochemical impedance of 5 vol.% HC-electrode in Na-cell obtained after rate-capability tests. Graphs are aligned based on as testing temperature between 10–40 °C from top to bottom. Left, middle, and right column show results obtained at 0.5 V, 0.06 V, and 0.015 V, respectively.

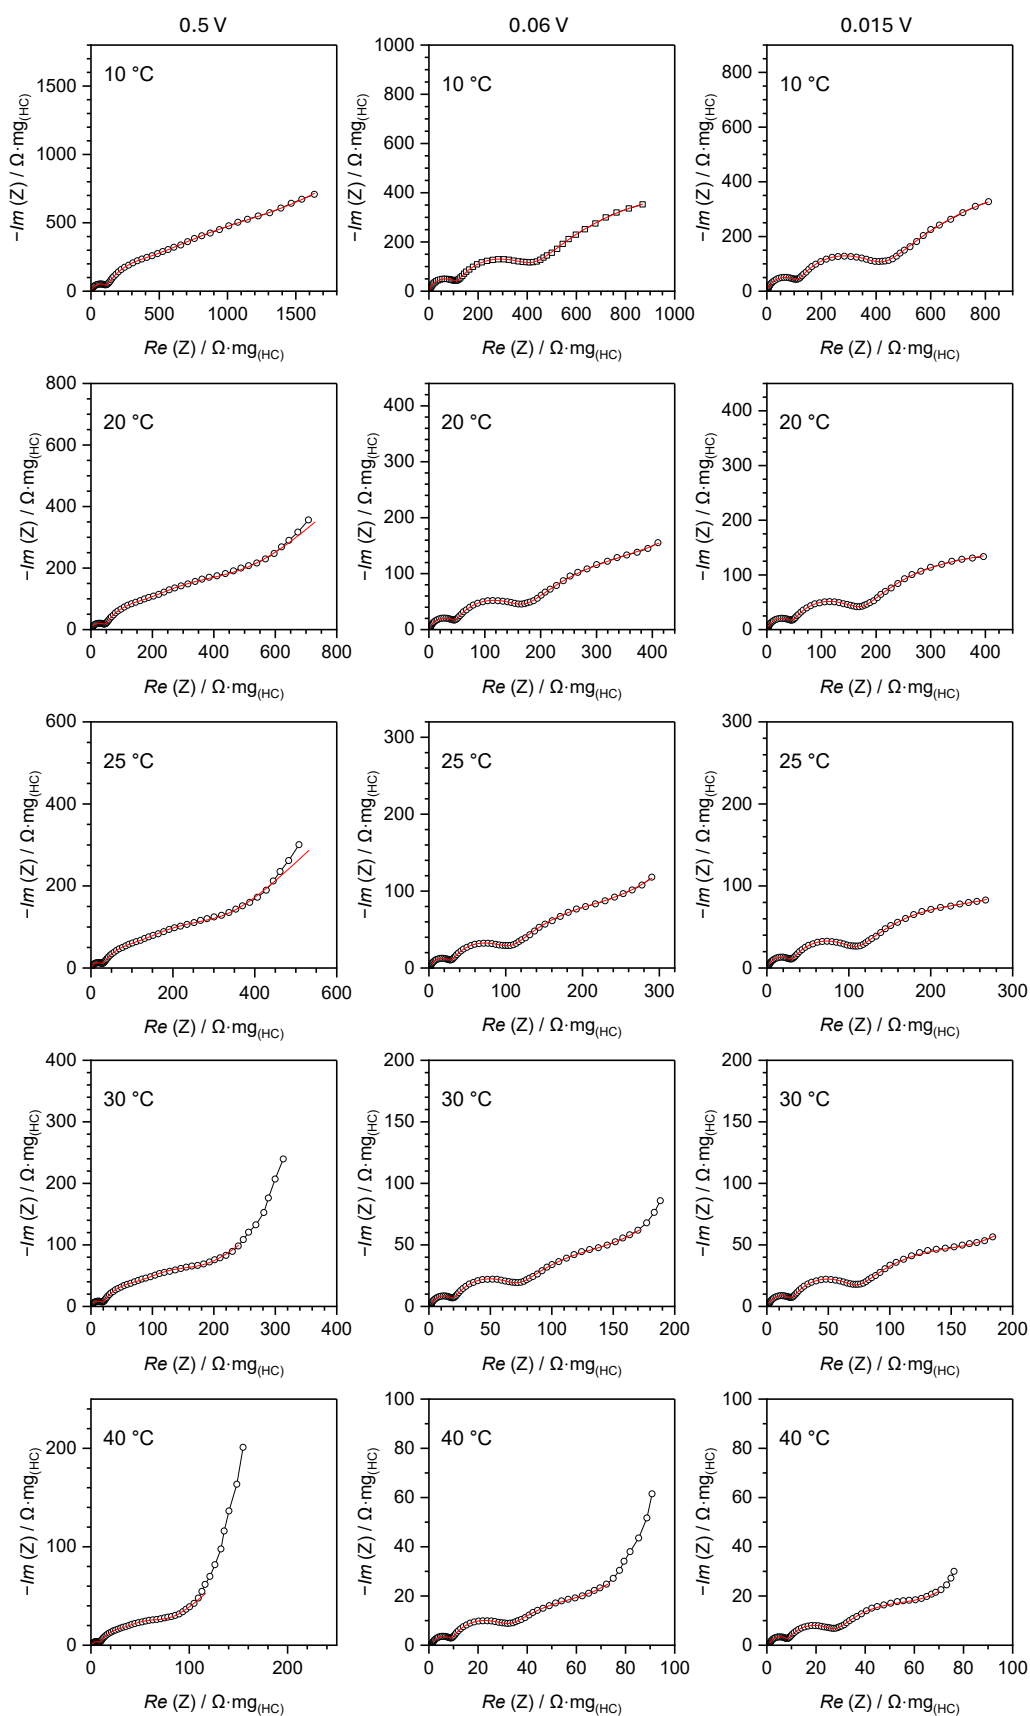

**Figure S19.** Nyquist plots of electrochemical impedance of 5 vol.% HC-electrode in Li-cell obtained after rate-capability tests. Graphs are aligned based on testing temperature between 10–40 °C from top to bottom. Left, middle, and right column show results obtained at 0.5 V, 0.06 V, and 0.015 V, respectively.

(a)

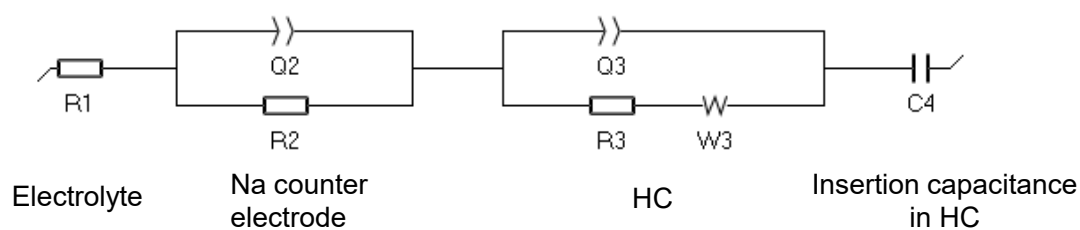

(b)

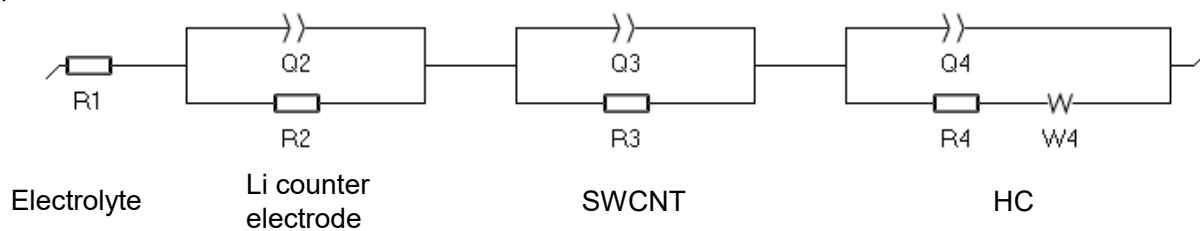

**Figure S20.** Equivalent circuits for EIS analysis applied to (a) Na cell and (b) Li cell. R3 in circuit (a) and R4 in circuit (b) are attributed to charge-transfer resistances. These equivalent circuit were prepared by referring to the study of single-particle electrodes.<sup>6</sup>

**Table S4.**  $R_{ct}$  of 5 vol. % HC-electrode in Na-/Li-cells extracted from Nyquist plots shown in Fig. S12 and S13. $R_{ct}$  at 0.5 V

| Temperature / °C | $R_{ct}$ (Na) / $\Omega \cdot \text{mg}$ | $R_{ct}$ (Li) / $\Omega \cdot \text{mg}$ |
|------------------|------------------------------------------|------------------------------------------|
| 40               | 32                                       | 30                                       |
| 30               | 61                                       | 72                                       |
| 25               | 83                                       | 101                                      |
| 20               | 129                                      | 142                                      |
| 10               | 318                                      | 292                                      |

 $R_{ct}$  at 0.06 V

| Temperature / °C | $R_{ct}$ (Na) / $\Omega \cdot \text{mg}$ | $R_{ct}$ (Li) / $\Omega \cdot \text{mg}$ |
|------------------|------------------------------------------|------------------------------------------|
| 40               | 17                                       | 23                                       |
| 30               | 39                                       | 50                                       |
| 25               | 61                                       | 74                                       |
| 20               | 93                                       | 116                                      |
| 10               | 223                                      | 290                                      |

 $R_{ct}$  at 0.015 V

| Temperature / °C | $R_{ct}$ (Na) / $\Omega \cdot \text{mg}$ | $R_{ct}$ (Li) / $\Omega \cdot \text{mg}$ |
|------------------|------------------------------------------|------------------------------------------|
| 40               | 22                                       | 19                                       |
| 30               | 46                                       | 51                                       |
| 25               | 65                                       | 75                                       |
| 20               | 91                                       | 119                                      |
| 10               | 199                                      | 287                                      |

## References in supporting information

1. K. Gotoh, M. Maeda, A. Nagai, A. Goto, M. Tansho, K. Hashi, T. Shimizu, and H. Ishida, "Properties of a novel hard-carbon optimized to large size Li ion secondary battery studied by  $^7\text{Li}$  NMR" *Journal of Power Sources*, **162**, 1322 (2006).
2. Kureha Battery Materials Japan Co., Ltd., "High-performance Anode Material CARBOTRON® P" [https://www.kureha.co.jp/development/story/pdf/catalog\\_hc\\_eg\\_20120924.pdf](https://www.kureha.co.jp/development/story/pdf/catalog_hc_eg_20120924.pdf), (accessed 2023/04/30).
3. K. Kubota, S. Shimadzu, N. Yabuuchi, S. Tominaka, S. Shiraiishi, M. Abreu-Sepulveda, A. Manivannan, K. Gotoh, M. Fukunishi, M. Dahbi, and S. Komaba, "Structural Analysis of Sucrose-Derived Hard Carbon and Correlation with the Electrochemical Properties for Lithium, Sodium, and Potassium Insertion" *Chem. Mater.*, **32**, 2961 (2020).
4. H. Fujimoto, "A new estimation method for the degree of graphitization for random layer lattices" *Carbon*, **48**, 3446 (2010).
5. M. Okubo, Y. Tanaka, H. Zhou, T. Kudo, and I. Honma, "Determination of Activation Energy for Li Ion Diffusion in Electrodes" *J. Phys. Chem. B*, **113**, 2840 (2009).
6. K. Dokko, Y. Fujita, M. Mohamedi, M. Umeda, I. Uchida, and J. R. Selmán, "Electrochemical impedance study of Li-ion insertion into mesocarbon microbead single particle electrode: Part II. Disordered carbon" *Electrochimica Acta*, **47**, 933 (2001).
